# Supplementary material for: Assessment of RainDrop BS-seq as a method for large-scale, targeted bisulfite sequencing
Source: PubMed Central journal article supplement (PMC4063826; doi:10.4161/epi.28041), 2014-02-11
Supplement: epi-9-678-s01.pdf [file epi-9-678-s01.pdf]

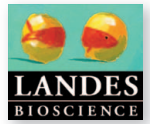

## **Supplemental Material to:**

**Dirk S Paul, Paul Guilhamon, Anna Karpathakis,  
Lee M Butcher, Christina Thirlwell, Andrew Feber,  
and Stephan Beck**

**Assessment of RainDrop BS-seq as a method for large-  
scale, targeted bisulfite sequencing**

**Epigenetics 2013; 9(5)**

**<http://dx.doi.org/10.4161/epi.28041>**

**[http://www.landesbioscience.com/journals/epigenetics/  
article/28041/](http://www.landesbioscience.com/journals/epigenetics/article/28041/)**

# **Assessment of RainDrop BS-seq as a method for large-scale, targeted bisulfite sequencing**

---

## **SUPPLEMENTARY INFORMATION**

---

**Dirk S. Paul, Paul Guilhamon, Anna Karpathakis, Lee M. Butcher, Christina Thirlwell, Andrew Feber and Stephan Beck**

UCL Cancer Institute; University College London; London, United Kingdom

Correspondence:

Dirk S. Paul (d.paul@ucl.ac.uk) and Stephan Beck (s.beck@ucl.ac.uk)

UCL Cancer Institute, 72 Huntley Street, London, WC1E 6DD, United Kingdom

## Table of Contents

|                   |                                                                                                            |    |
|-------------------|------------------------------------------------------------------------------------------------------------|----|
| <b>Figure S1.</b> | Digital gel electrophoresis of DNA amplicons following microdroplet PCR and purification.....              | 3  |
| <b>Figure S2.</b> | Digital gel electrophoresis of DNA amplicons following universal PCR and purification.....                 | 4  |
| <b>Figure S3.</b> | Fraction of target bases with a coverage ranging from 1 to 1000 across target loci .....                   | 5  |
| <b>Figure S4.</b> | Assessment of the quantitative resolution of the 450K array platform in comparison to RainDrop BS-seq..... | 6  |
| <b>Figure S5.</b> | Correlation of DNA methylation levels and comparison to 450K arrays.....                                   | 7  |
| <b>Figure S6.</b> | Scatterplot of DNA methylation levels and comparison to 450K arrays.....                                   | 8  |
| <b>Figure S7.</b> | Distribution of DNA methylation levels over the entire dynamic range of the 450K array .....               | 9  |
| <b>Figure S8.</b> | Methylation profiling of the <i>LAMA2</i> and <i>KCNQ1</i> target loci .....                               | 10 |
| <b>Table S1.</b>  | Selected genomic loci assessed using RainDrop BS-seq.....                                                  | 11 |
| <b>Table S2.</b>  | Summary sequencing and methylation statistics for the primer panels.....                                   | 21 |
| <b>Table S3.</b>  | Primer sequences for the universal PCR and Illumina sequencing reaction .....                              | 24 |

## Supplementary Figures

**Figure S1. Digital gel electrophoresis of DNA amplicons following microdroplet PCR and purification.** The PCR amplicons were analyzed using a High Sensitivity DNA Kit [Agilent Technologies]. Gels are shown for (A) BL, (B) SCL and (C) FFPE samples using the SC primer panel, and (D) BL and (E) SCL samples using the BM primer panel. The expected band of the amplified fragments was between 120 and 250 bp. The band indicating primer dimers was below 100 bp. For WGA samples, we observed bands corresponding to unspecific, high-molecular fragments.

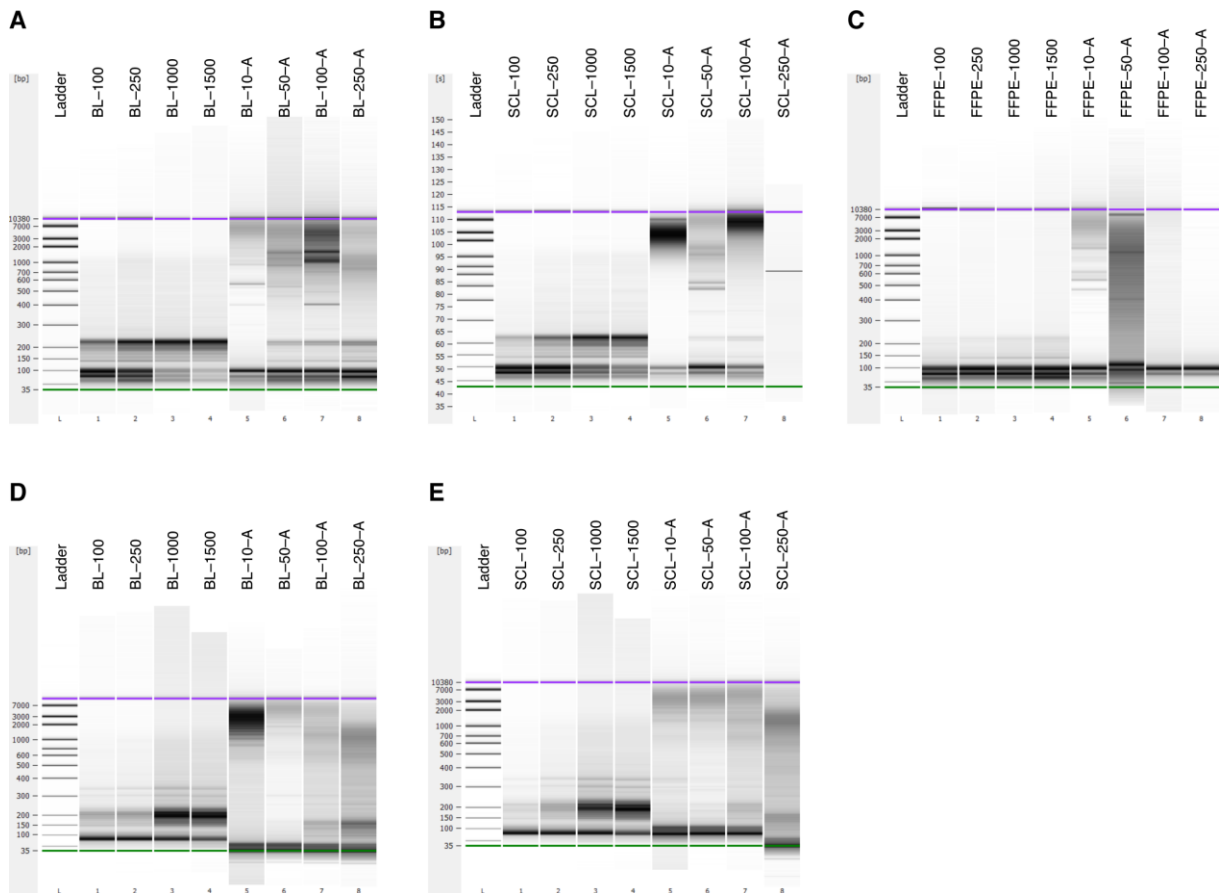

**Figure S2. Digital gel electrophoresis of DNA amplicons following universal PCR and purification.** The PCR amplicons were analyzed using a DNA 1000 Kit [Agilent Technologies]. Gels are shown for (A) BL, (B) SCL and (C) FFPE samples using the SC primer panel, and (D) BL and (E) SCL samples using the BM panel. The expected band of the amplified fragments after integration of Illumina adapters was shifted by +130 bp (Fig. S1 and Table S3A). Primer dimers (<100 bp), which could affect the subsequent DNA sequencing reaction, were not observed.

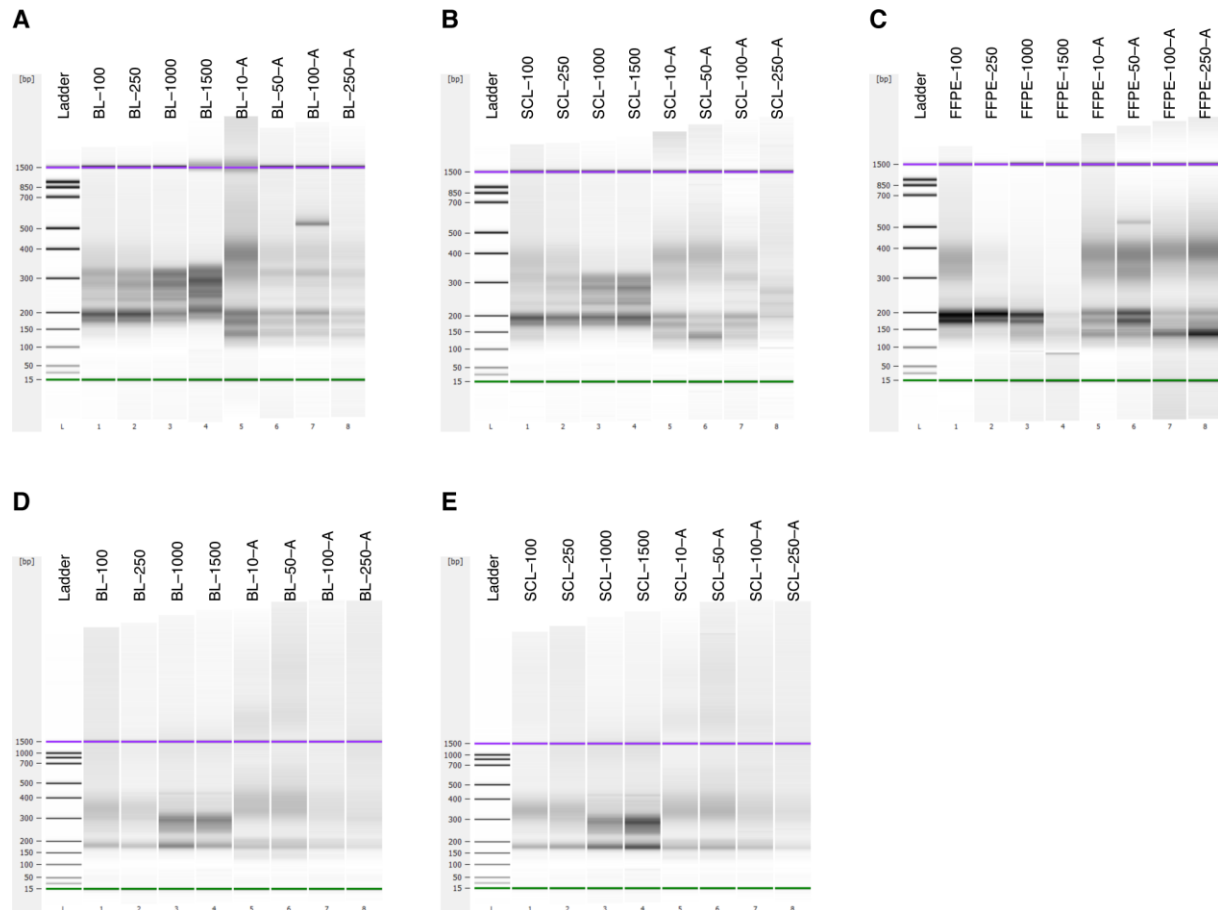

**Figure S3. Fraction of target bases with a coverage ranging from 1 to 1000 across target loci.** The plots show the fraction of target bases with a coverage ranging from 1 to 1000 at 27 target loci across (A) BL, (B) SCL and (C) FFPE samples, assessed using the SC panel. A coverage of five sequencing reads is indicated with a dotted line. For BL and SCL samples, the coverage profiles for unamplified samples as well as the 100 and 250 ng WGA samples, were relatively similar across different starting DNA amounts.

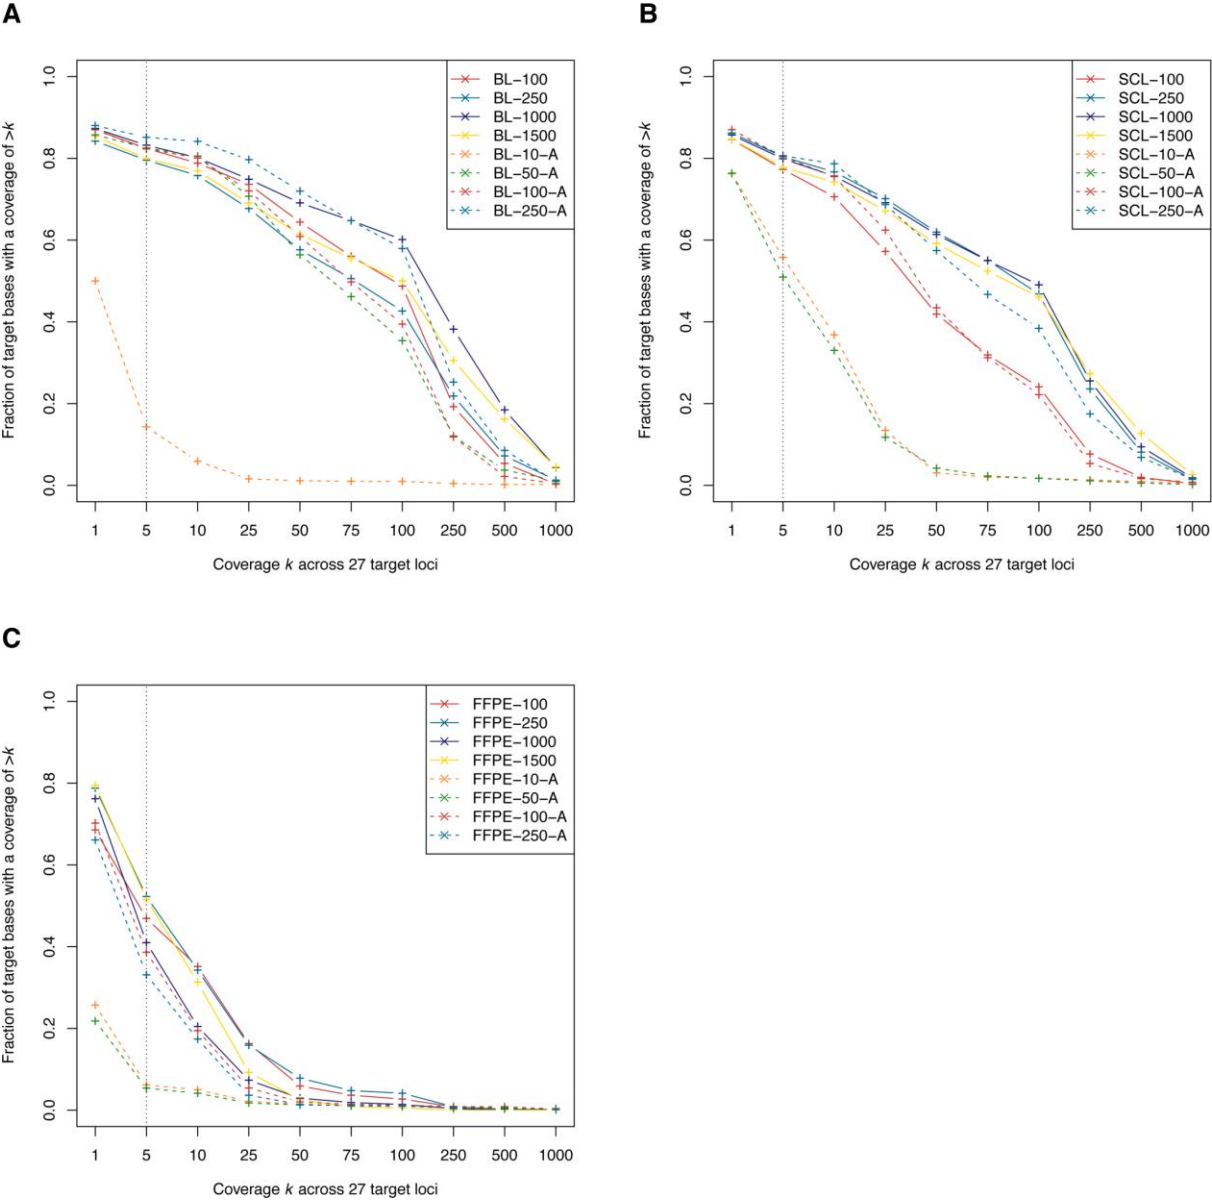

**Figure S4. Assessment of the quantitative resolution of the 450K array platform in comparison to RainDrop BS-seq.** We performed two technical replicates each of *in vitro* methylated and unmethylated whole blood genomic DNA. The *in vitro* methylated DNA was created using SssI methyltransferase. The *in vitro* unmethylated DNA was created by performing two sequential rounds of whole-genome amplification using REPLI-g. Array processing and analysis were performed as described in the Methods section. The figure shows the distribution of beta values for these experiments. Non-CpG probes (n=2800) are indicated with an asterisk. For *in vitro* methylated CpG sites we found that 95% of 450K probes had beta values above 0.82, while *in vitro* unmethylated CpGs had beta values below 0.31. On the basis of these data, the quantitative resolution of RainDrop BS-seq is comparable to 450K arrays to detect ‘methylated’ sites (i.e.  $\beta \geq 0.82$  vs  $\geq 4/5$  [ $\geq 80\%$ ] methylated reads), and actually exceeds the 450K array’s ability to resolve ‘unmethylated’ sites (i.e.  $\beta \leq 0.31$  vs  $\leq 1/5$  [ $\leq 20\%$ ] methylated reads). Therefore, we suggest a quantitative resolution of 20% to be appropriate for the experiments performed in this study.

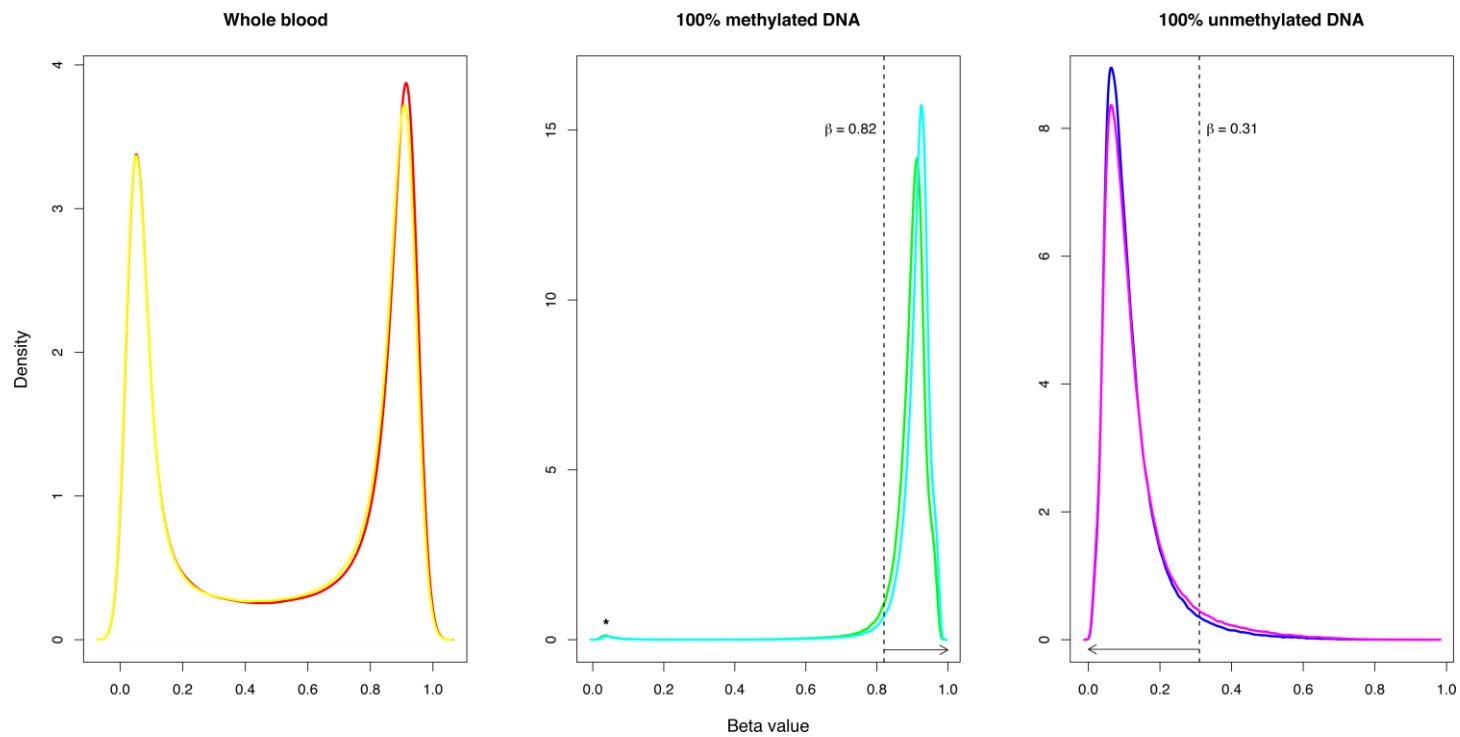





**Figure S6. Scatterplot of DNA methylation levels and comparison to 450K arrays.** (A) The scatterplot matrix shows the correlation of DNA methylation levels across BL samples (n=497 CpG sites), assessed using the BM panel. (B) In addition, we correlated a subset of these CpG sites that are represented on the 450K array (n=81). The assessed CpG sites correspond to those shown in Figure 4A.

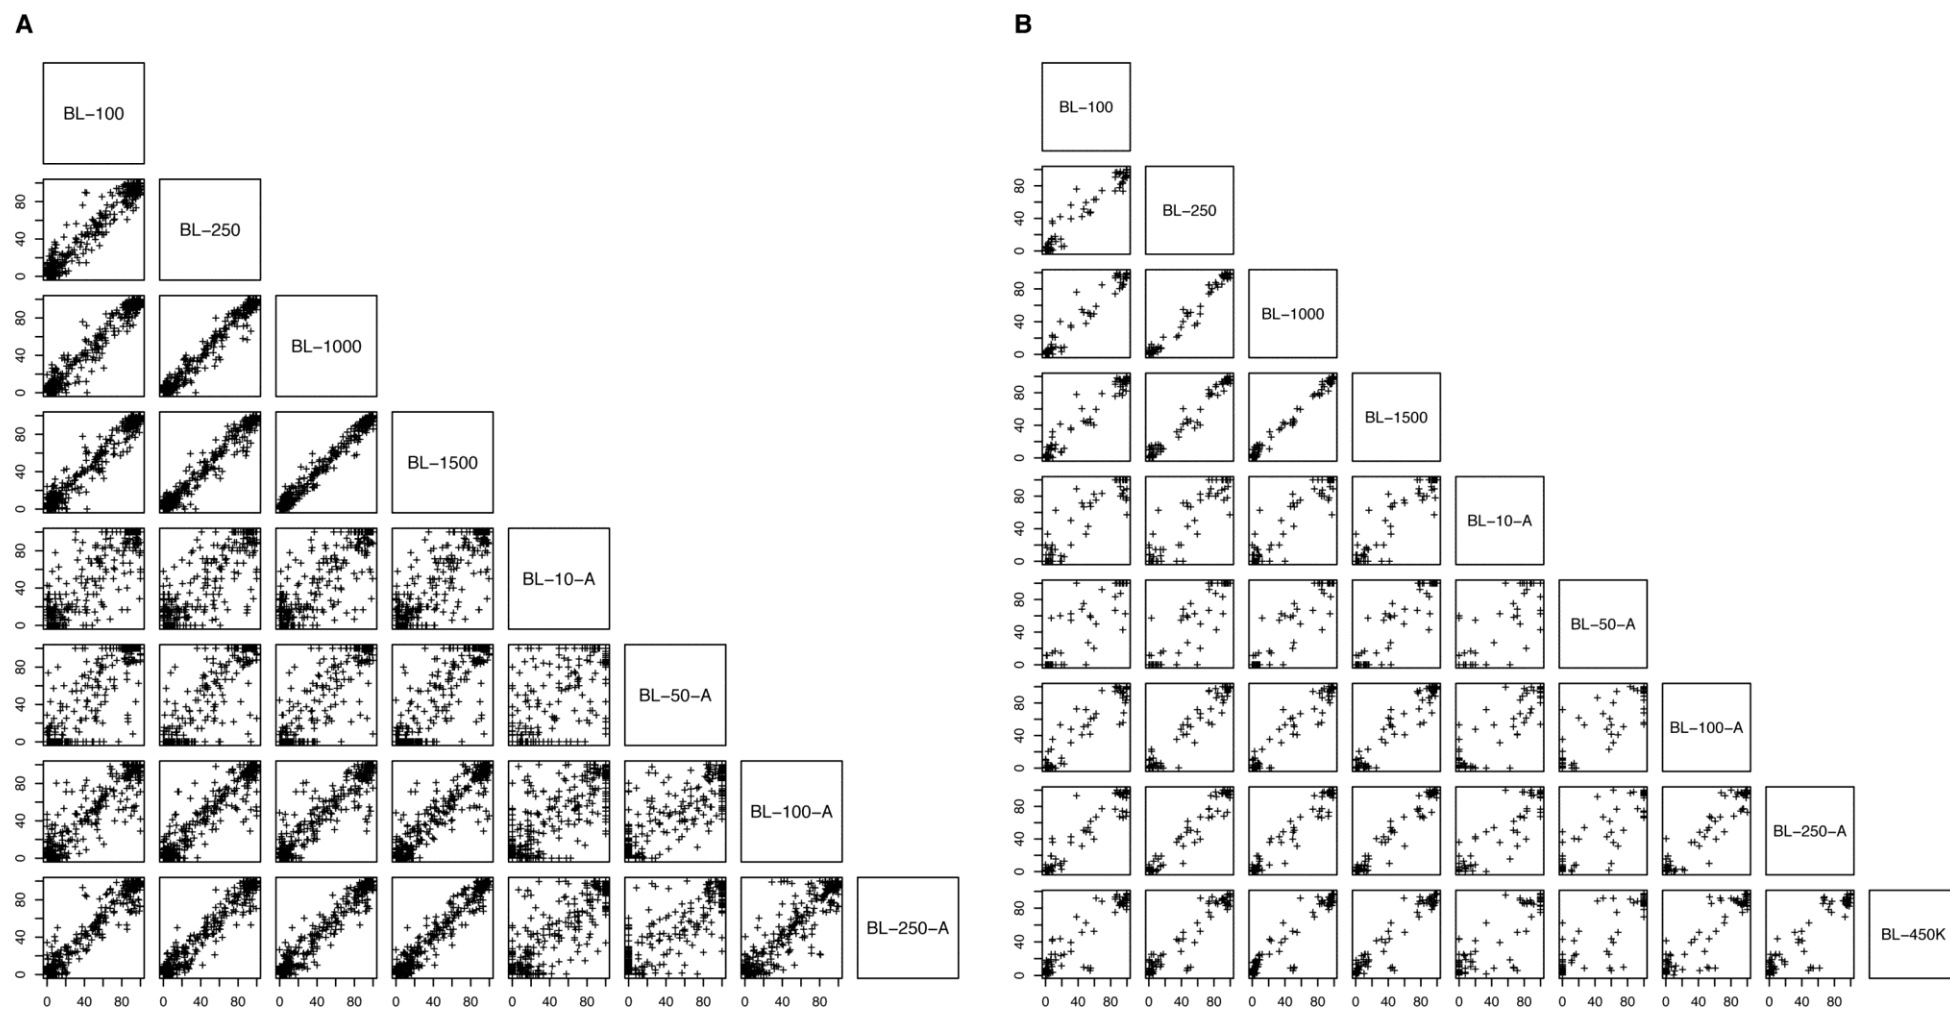

**Figure S7. Distribution of DNA methylation levels over the entire dynamic range of the 450K array.** The boxplots show the observed DNA methylation levels for CpG sites that, according to the 450K array, fall into low (0–20%), medium (20–80%) and high (80–100%) methylation bins (indicated with light blue shading). As in Figure S6B, we assessed CpG sites (n=81) in BL samples that are represented on the 450K array.

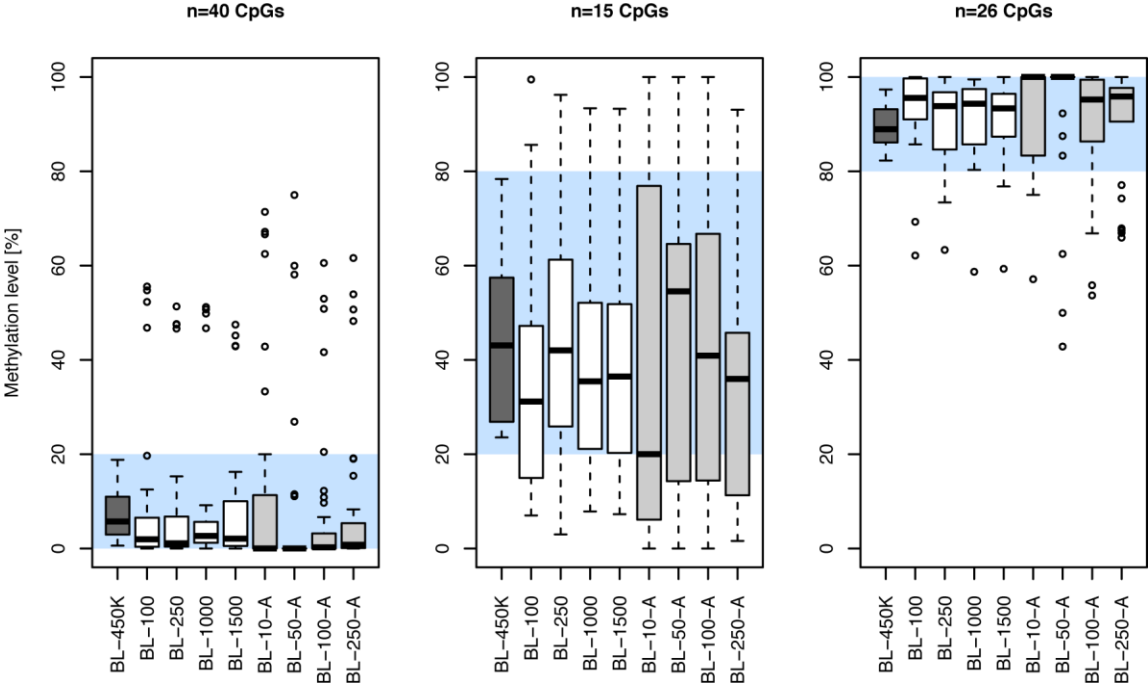

**Figure S8. Methylation profiling of the (A) *LAMA2* and (B) *KCNQ1* target loci.** The figure shows the *LAMA2* (BM primer panel; Locus ID: 161; Amplicon ID: 175) and *KCNQ1* (BM primer panel; Locus ID: 243; Amplicon ID: 263) gene loci in the UCSC Genome Browser. We annotated the genomic loci with the RainDrop BS-seq target region coordinates in gray, and the methylation levels (color range: yellow–blue) assessed in independent experiments using a range of starting DNA quantities (10–1500 ng) and application of MDA-based WGA of bisulfite-converted DNA (indicated with ‘-A’). We also added the methylation data generated on the 450K array platform.

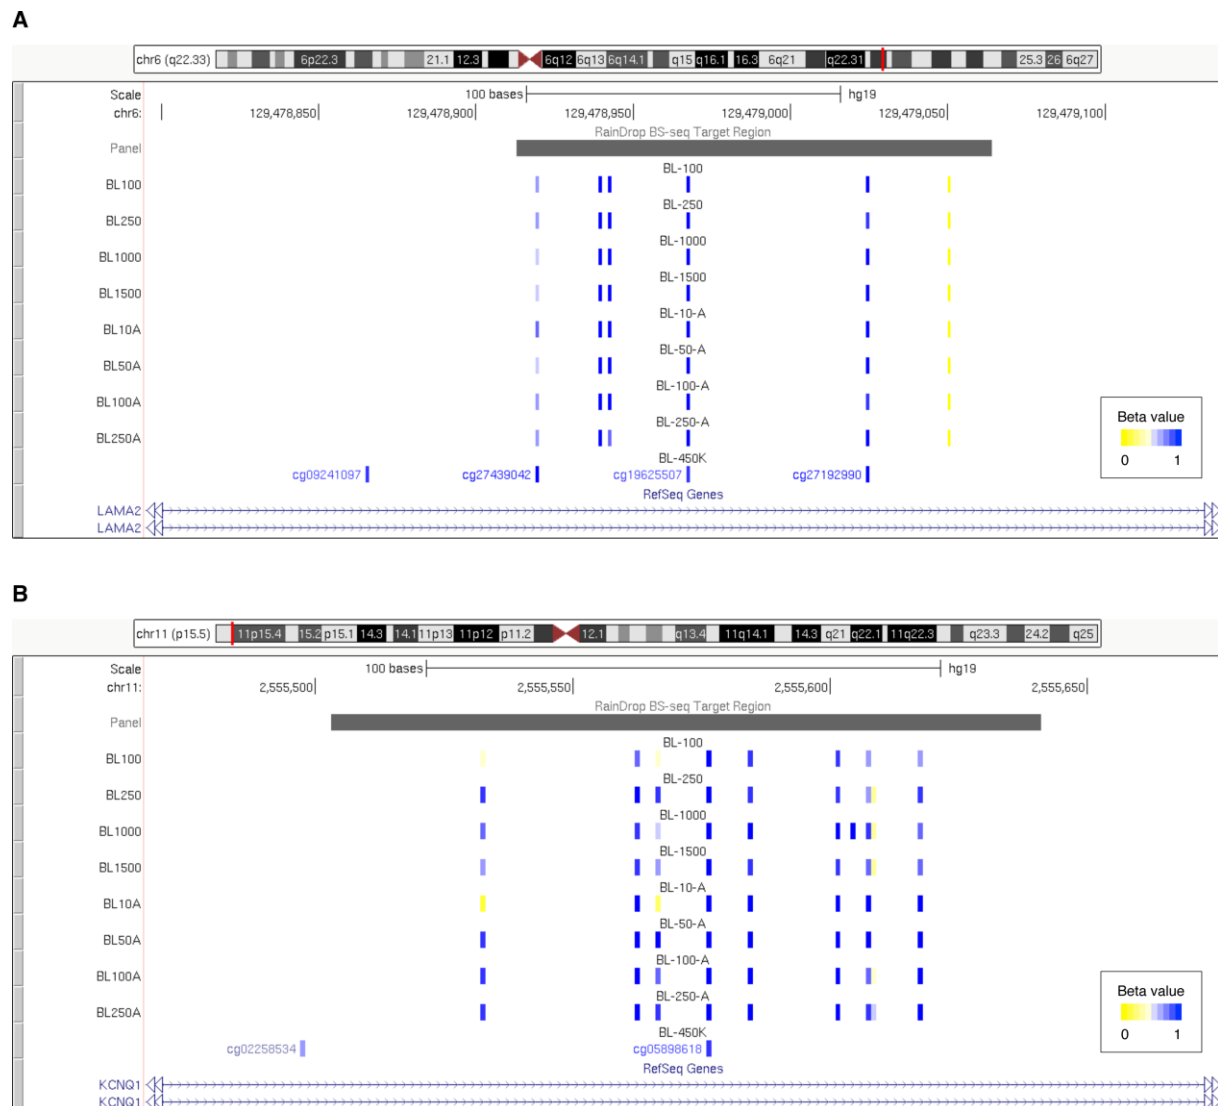

Supplementary Tables

**Table S1. Selected genomic loci assessed using RainDrop BS-seq.** The table provides genomic coordinates (hg19) of the target loci and PCR amplicons. In addition, CpG sites that are present on the 450K array and located within the target loci are indicated. **(A)** The SC primer panel targeted 27 genomic regions (500 PCR amplicons) containing a total of 212 CpG sites that are represented on the 450K array. **(B)** The BM panel targeted 462 candidate epigenetic biomarker loci (501 PCR amplicons) containing 778 of the 450K CpG sites.

**(A) SC Panel**

**(B) BM Panel**

| Locus |    | Amplicon |             |             | 450K CpG Site |             | Locus |    | Amplicon |             |             | 450K CpG Site |             |
|-------|----|----------|-------------|-------------|---------------|-------------|-------|----|----------|-------------|-------------|---------------|-------------|
| ID    | ID | Chr      | Start       | End         | ID            | Position    | ID    | ID | Chr      | Start       | End         | ID            | Position    |
| 1     | 1  | 1        | 3,569,197   | 3,569,352   | NA            | NA          | 1     | 1  | 1        | 949,741     | 949,920     | cg04788999    | 949,850     |
| 1     | 2  | 1        | 3,569,197   | 3,569,380   | NA            | NA          | 1     | 1  | 1        | 949,741     | 949,920     | cg16526047    | 949,893     |
| 1     | 3  | 1        | 3,569,335   | 3,569,530   | cg16741710    | 3,569,386   | 2     | 2  | 1        | 1,158,573   | 1,158,728   | cg03467014    | 1,158,648   |
| 1     | 4  | 1        | 3,569,364   | 3,569,562   | cg16741710    | 3,569,386   | 3     | 3  | 1        | 2,266,291   | 2,266,447   | cg16600733    | 2,266,362   |
| 1     | 5  | 1        | 3,569,504   | 3,569,698   | cg05924583    | 3,569,624   | 3     | 3  | 1        | 2,266,291   | 2,266,447   | cg02687883    | 2,266,431   |
| 1     | 6  | 1        | 3,569,597   | 3,569,757   | cg05924583    | 3,569,624   | 4     | 4  | 1        | 3,459,820   | 3,460,014   | cg06511312    | 3,459,949   |
| 1     | 7  | 1        | 3,569,703   | 3,569,809   | NA            | NA          | 5     | 5  | 1        | 3,567,586   | 3,567,765   | cg07382920    | 3,567,646   |
| 1     | 8  | 1        | 3,569,714   | 3,569,870   | NA            | NA          | 5     | 5  | 1        | 3,567,586   | 3,567,765   | cg10038618    | 3,567,719   |
| 1     | 9  | 1        | 3,569,776   | 3,569,941   | cg11504517    | 3,569,899   | 5     | 5  | 1        | 3,567,586   | 3,567,765   | cg24678611    | 3,567,732   |
| 1     | 10 | 1        | 3,569,873   | 3,570,003   | cg11504517    | 3,569,899   | 5     | 5  | 1        | 3,567,586   | 3,567,765   | cg25731359    | 3,567,738   |
| 1     | 11 | 1        | 3,569,927   | 3,570,115   | NA            | NA          | 6     | 6  | 1        | 10,579,082  | 10,579,235  | cg10801633    | 10,579,190  |
| 1     | 12 | 1        | 3,570,037   | 3,570,226   | NA            | NA          | 7     | 7  | 1        | 12,123,442  | 12,123,552  | NA            | NA          |
| 1     | 13 | 1        | 3,570,082   | 3,570,279   | NA            | NA          | 7     | 8  | 1        | 12,123,527  | 12,123,696  | cg05121790    | 12,123,554  |
| 1     | 14 | 1        | 3,570,183   | 3,570,343   | NA            | NA          | 8     | 9  | 1        | 14,343,060  | 14,343,254  | cg13686807    | 14,343,114  |
| 1     | 15 | 1        | 3,570,262   | 3,570,460   | NA            | NA          | 9     | 10 | 1        | 21,978,575  | 21,978,724  | cg18150885    | 21,978,612  |
| 2     | 16 | 2        | 74,271,947  | 74,272,097  | NA            | NA          | 9     | 10 | 1        | 21,978,575  | 21,978,724  | cg08892236    | 21,978,698  |
| 2     | 17 | 2        | 74,272,021  | 74,272,196  | cg00694660    | 74,272,104  | 10    | 11 | 1        | 21,986,195  | 21,986,331  | cg05120085    | 21,986,286  |
| 2     | 18 | 2        | 74,272,076  | 74,272,207  | cg00694660    | 74,272,104  | 11    | 12 | 1        | 22,615,848  | 22,616,017  | cg021053477   | 22,615,900  |
| 2     | 19 | 2        | 74,272,223  | 74,272,373  | NA            | NA          | 12    | 13 | 1        | 25,257,516  | 25,257,669  | cg15014975    | 25,257,547  |
| 2     | 20 | 2        | 74,272,293  | 74,272,456  | NA            | NA          | 12    | 13 | 1        | 25,257,516  | 25,257,669  | cg24019564    | 25,257,566  |
| 2     | 21 | 2        | 74,272,378  | 74,272,525  | NA            | NA          | 12    | 13 | 1        | 25,257,516  | 25,257,669  | cg10993442    | 25,257,587  |
| 2     | 22 | 2        | 74,272,466  | 74,272,665  | NA            | NA          | 12    | 13 | 1        | 25,257,516  | 25,257,669  | cg24842859    | 25,257,599  |
| 2     | 23 | 2        | 74,272,556  | 74,272,748  | NA            | NA          | 12    | 13 | 1        | 25,257,516  | 25,257,669  | cg20695936    | 25,257,624  |
| 2     | 24 | 2        | 74,272,627  | 74,272,820  | cg01355757    | 74,272,773  | 12    | 13 | 1        | 25,257,516  | 25,257,669  | cg13106389    | 25,257,626  |
| 2     | 25 | 2        | 74,272,729  | 74,272,870  | cg01355757    | 74,272,773  | 12    | 13 | 1        | 25,257,516  | 25,257,669  | cg18087266    | 25,257,629  |
| 2     | 26 | 2        | 74,272,818  | 74,272,962  | cg01244346    | 74,272,962  | 13    | 14 | 1        | 47,898,845  | 47,898,969  | cg05658236    | 47,898,911  |
| 2     | 27 | 2        | 74,272,882  | 74,273,079  | cg01244346    | 74,272,962  | 14    | 15 | 1        | 55,752,451  | 55,752,568  | cg03847541    | 55,752,514  |
| 2     | 28 | 2        | 74,272,989  | 74,273,151  | NA            | NA          | 15    | 16 | 1        | 65,991,125  | 65,991,285  | cg08234308    | 65,991,176  |
| 2     | 29 | 2        | 74,273,089  | 74,273,270  | NA            | NA          | 16    | 17 | 1        | 87,795,021  | 87,795,189  | cg03129717    | 87,795,122  |
| 2     | 30 | 2        | 74,273,116  | 74,273,311  | NA            | NA          | 17    | 18 | 1        | 91,182,737  | 91,182,936  | cg18322569    | 91,182,777  |
| 2     | 31 | 2        | 74,273,251  | 74,273,450  | NA            | NA          | 17    | 18 | 1        | 91,182,737  | 91,182,936  | cg17241310    | 91,182,856  |
| 2     | 32 | 2        | 74,273,390  | 74,273,562  | NA            | NA          | 18    | 19 | 1        | 110,052,257 | 110,052,519 | cg05947402    | 110,052,352 |
| 2     | 33 | 2        | 74,273,458  | 74,273,609  | NA            | NA          | 18    | 19 | 1        | 110,052,257 | 110,052,519 | cg21646186    | 110,052,458 |
| 3     | 34 | 2        | 106,681,135 | 106,681,319 | cg22948077    | 106,681,280 | 18    | 19 | 1        | 110,052,257 | 110,052,519 | cg12419308    | 110,052,464 |
| 3     | 35 | 2        | 106,681,191 | 106,681,373 | cg22948077    | 106,681,280 | 18    | 19 | 1        | 110,052,257 | 110,052,519 | cg06764670    | 110,052,490 |
| 3     | 36 | 2        | 106,681,292 | 106,681,463 | NA            | NA          | 19    | 20 | 1        | 111,175,024 | 111,175,158 | cg05656442    | 111,175,082 |
| 3     | 37 | 2        | 106,681,350 | 106,681,533 | NA            | NA          | 20    | 21 | 1        | 115,124,440 | 115,124,544 | cg20145149    | 115,124,491 |
| 3     | 38 | 2        | 106,681,468 | 106,681,667 | NA            | NA          | 21    | 22 | 1        | 121,261,272 | 121,261,451 | cg07794500    | 121,261,369 |
| 3     | 39 | 2        | 106,681,612 | 106,681,718 | NA            | NA          | 21    | 22 | 1        | 121,261,272 | 121,261,451 | cg05827631    | 121,261,404 |
| 3     | 40 | 2        | 106,681,670 | 106,681,869 | cg10735632    | 106,681,831 | 22    | 23 | 1        | 144,930,878 | 144,931,062 | cg02854922    | 144,930,964 |
| 3     | 41 | 2        | 106,681,804 | 106,681,975 | cg10735632    | 106,681,831 | 23    | 24 | 1        | 146,547,949 | 146,548,127 | cg12406683    | 146,548,032 |
| 3     | 41 | 2        | 106,681,804 | 106,681,975 | cg14535980    | 106,681,937 | 24    | 25 | 1        | 147,736,119 | 147,736,302 | cg21167167    | 147,736,190 |
| 3     | 41 | 2        | 106,681,804 | 106,681,975 | cg21838979    | 106,681,945 | 25    | 26 | 1        | 155,271,700 | 155,271,834 | cg15490880    | 155,271,762 |
| 3     | 42 | 2        | 106,681,861 | 106,682,026 | cg14535980    | 106,681,937 | 26    | 27 | 1        | 161,442,628 | 161,442,808 | cg08527195    | 161,442,697 |
| 3     | 42 | 2        | 106,681,861 | 106,682,026 | cg21838979    | 106,681,945 | 26    | 27 | 1        | 161,442,628 | 161,442,808 | cg09846895    | 161,442,738 |
| 3     | 42 | 2        | 106,681,861 | 106,682,026 | cg06499647    | 106,681,983 | 27    | 28 | 1        | 171,811,400 | 171,811,594 | cg20800956    | 171,811,477 |
| 3     | 42 | 2        | 106,681,861 | 106,682,026 | cg07510423    | 106,681,998 | 27    | 28 | 1        | 171,811,400 | 171,811,594 | cg16515523    | 171,811,529 |
| 3     | 43 | 2        | 106,681,972 | 106,682,072 | cg06499647    | 106,681,983 | 28    | 29 | 1        | 177,002,175 | 177,002,347 | cg22506490    | 177,002,228 |
| 3     | 43 | 2        | 106,681,972 | 106,682,072 | cg07510423    | 106,681,998 | 29    | 30 | 1        | 202,317,732 | 202,317,906 | cg05798608    | 202,317,770 |
| 3     | 44 | 2        | 106,682,239 | 106,682,309 | NA            | NA          | 29    | 30 | 1        | 202,317,732 | 202,317,906 | cg13976253    | 202,317,780 |
| 3     | 45 | 2        | 106,682,240 | 106,682,439 | cg09661951    | 106,682,331 | 30    | 31 | 1        | 209,822,863 | 209,823,015 | cg07168232    | 209,822,928 |
| 3     | 46 | 2        | 106,682,276 | 106,682,450 | cg09661951    | 106,682,331 | 31    | 32 | 1        | 210,425,198 | 210,425,298 | cg14561217    | 210,425,254 |
| 3     | 47 | 2        | 106,682,405 | 106,682,536 | NA            | NA          | 31    | 33 | 1        | 210,425,255 | 210,425,409 | NA            | NA          |
| 3     | 48 | 2        | 106,682,495 | 106,682,669 | cg10885338    | 106,682,640 | 32    | 34 | 1        | 224,400,579 | 224,400,742 | cg01553584    | 224,400,672 |
| 3     | 49 | 2        | 106,682,577 | 106,682,769 | cg10885338    | 106,682,640 | 33    | 35 | 1        | 227,057,956 | 227,058,113 | cg20000641    | 227,058,046 |
| 3     | 50 | 2        | 106,682,646 | 106,682,806 | NA            | NA          | 33    | 35 | 1        | 227,057,956 | 227,058,113 | cg00479101    | 227,058,070 |
| 3     | 51 | 2        | 106,682,765 | 106,682,909 | NA            | NA          | 34    | 36 | 1        | 230,289,965 | 230,290,156 | cg22153407    | 230,290,089 |
| 4     | 52 | 2        | 121,669,794 | 121,669,993 | NA            | NA          | 35    | 37 | 1        | 231,981,776 | 231,981,974 | cg09186051    | 231,981,906 |
| 4     | 53 | 2        | 121,669,892 | 121,670,063 | NA            | NA          | 36    | 38 | 1        | 232,940,913 | 232,941,059 | cg02191044    | 232,940,990 |
| 4     | 54 | 2        | 121,670,000 | 121,670,160 | NA            | NA          | 36    | 38 | 1        | 232,940,913 | 232,941,059 | cg02903907    | 232,941,055 |

















|    |     |    |            |            |            |            |     |     |    |            |            |            |            |
|----|-----|----|------------|------------|------------|------------|-----|-----|----|------------|------------|------------|------------|
| 27 | 495 | 22 | 42,828,673 | 42,828,847 | NA         | NA         | 376 | 406 | 17 | 56,084,407 | 56,084,548 | cg14553224 | 56,084,507 |
| 27 | 496 | 22 | 42,828,757 | 42,828,944 | NA         | NA         | 377 | 407 | 17 | 75,368,850 | 75,369,019 | cg06848185 | 75,368,902 |
| 27 | 497 | 22 | 42,828,869 | 42,829,060 | cg07464578 | 42,828,946 | 377 | 408 | 17 | 75,368,995 | 75,369,168 | cg19554255 | 75,369,051 |
| 27 | 498 | 22 | 42,828,925 | 42,829,117 | cg07464578 | 42,828,946 | 377 | 408 | 17 | 75,368,995 | 75,369,168 | cg16779463 | 75,369,055 |
| 27 | 499 | 22 | 42,829,044 | 42,829,182 | NA         | NA         | 377 | 408 | 17 | 75,368,995 | 75,369,168 | cg17300544 | 75,369,091 |
| 27 | 500 | 22 | 42,829,135 | 42,829,242 | NA         | NA         | 377 | 409 | 17 | 75,369,102 | 75,369,272 | cg03804136 | 75,369,219 |
|    |     |    |            |            |            |            | 377 | 409 | 17 | 75,369,102 | 75,369,272 | cg15044248 | 75,369,224 |
|    |     |    |            |            |            |            | 377 | 409 | 17 | 75,369,102 | 75,369,272 | cg02884239 | 75,369,228 |
|    |     |    |            |            |            |            | 378 | 410 | 17 | 76,220,836 | 76,220,997 | cg19272238 | 76,220,898 |
|    |     |    |            |            |            |            | 378 | 410 | 17 | 76,220,836 | 76,220,997 | cg07366188 | 76,220,929 |
|    |     |    |            |            |            |            | 378 | 410 | 17 | 76,220,836 | 76,220,997 | cg10070788 | 76,220,955 |
|    |     |    |            |            |            |            | 379 | 411 | 17 | 76,348,748 | 76,348,914 | cg17845279 | 76,348,823 |
|    |     |    |            |            |            |            | 379 | 411 | 17 | 76,348,748 | 76,348,914 | cg21640526 | 76,348,849 |
|    |     |    |            |            |            |            | 380 | 412 | 17 | 76,921,811 | 76,921,999 | cg06641285 | 76,921,829 |
|    |     |    |            |            |            |            | 380 | 412 | 17 | 76,921,811 | 76,921,999 | cg05306745 | 76,921,845 |
|    |     |    |            |            |            |            | 380 | 412 | 17 | 76,921,811 | 76,921,999 | cg15981475 | 76,921,948 |
|    |     |    |            |            |            |            | 381 | 413 | 17 | 76,932,217 | 76,932,388 | cg14779622 | 76,932,315 |
|    |     |    |            |            |            |            | 381 | 413 | 17 | 76,932,217 | 76,932,388 | cg17552357 | 76,932,332 |
|    |     |    |            |            |            |            | 382 | 414 | 17 | 78,155,158 | 78,155,313 | cg13855862 | 78,155,264 |
|    |     |    |            |            |            |            | 383 | 415 | 17 | 79,415,561 | 79,415,759 | cg01810575 | 79,415,682 |
|    |     |    |            |            |            |            | 384 | 416 | 17 | 79,971,390 | 79,971,506 | cg06105699 | 79,971,436 |
|    |     |    |            |            |            |            | 385 | 417 | 17 | 80,709,099 | 80,709,345 | cg00960700 | 80,709,150 |
|    |     |    |            |            |            |            | 386 | 418 | 18 | 12,911,072 | 12,911,244 | cg25356164 | 12,911,138 |
|    |     |    |            |            |            |            | 387 | 419 | 18 | 34,327,403 | 34,327,561 | cg21367586 | 34,327,498 |
|    |     |    |            |            |            |            | 388 | 420 | 18 | 74,499,448 | 74,499,560 | cg25691825 | 74,499,511 |
|    |     |    |            |            |            |            | 389 | 421 | 18 | 74,848,763 | 74,848,902 | cg12635694 | 74,848,845 |
|    |     |    |            |            |            |            | 390 | 422 | 18 | 77,793,100 | 77,793,237 | cg04727522 | 77,793,182 |
|    |     |    |            |            |            |            | 391 | 423 | 19 | 2,131,225  | 2,131,338  | cg05718393 | 2,131,293  |
|    |     |    |            |            |            |            | 391 | 423 | 19 | 2,131,225  | 2,131,338  | cg23103406 | 2,131,296  |
|    |     |    |            |            |            |            | 392 | 424 | 19 | 2,643,016  | 2,643,134  | cg15425921 | 2,643,085  |
|    |     |    |            |            |            |            | 393 | 425 | 19 | 6,495,792  | 6,495,950  | cg06548442 | 6,495,872  |
|    |     |    |            |            |            |            | 393 | 425 | 19 | 6,495,792  | 6,495,950  | cg11915671 | 6,495,897  |
|    |     |    |            |            |            |            | 394 | 426 | 19 | 6,746,129  | 6,746,248  | cg00513012 | 6,746,184  |
|    |     |    |            |            |            |            | 394 | 426 | 19 | 6,746,129  | 6,746,248  | cg19736654 | 6,746,221  |
|    |     |    |            |            |            |            | 395 | 427 | 19 | 8,214,628  | 8,214,731  | cg17909996 | 8,214,685  |
|    |     |    |            |            |            |            | 396 | 428 | 19 | 8,273,644  | 8,273,781  | cg24413781 | 8,273,693  |
|    |     |    |            |            |            |            | 397 | 429 | 19 | 10,450,412 | 10,450,532 | cg18054725 | 10,450,472 |
|    |     |    |            |            |            |            | 398 | 430 | 19 | 31,843,302 | 31,843,447 | cg22079008 | 31,843,360 |
|    |     |    |            |            |            |            | 398 | 430 | 19 | 31,843,302 | 31,843,447 | cg09253179 | 31,843,396 |
|    |     |    |            |            |            |            | 399 | 431 | 19 | 35,249,109 | 35,249,273 | cg00019275 | 35,249,217 |
|    |     |    |            |            |            |            | 400 | 432 | 19 | 37,019,197 | 37,019,372 | cg23949233 | 37,019,255 |
|    |     |    |            |            |            |            | 400 | 432 | 19 | 37,019,197 | 37,019,372 | cg16885608 | 37,019,262 |
|    |     |    |            |            |            |            | 400 | 432 | 19 | 37,019,197 | 37,019,372 | cg18105335 | 37,019,307 |
|    |     |    |            |            |            |            | 400 | 432 | 19 | 37,019,197 | 37,019,372 | cg18882201 | 37,019,327 |
|    |     |    |            |            |            |            | 400 | 432 | 19 | 37,019,197 | 37,019,372 | cg19990402 | 37,019,372 |
|    |     |    |            |            |            |            | 401 | 433 | 19 | 37,861,428 | 37,861,557 | cg06610641 | 37,861,546 |
|    |     |    |            |            |            |            | 401 | 434 | 19 | 37,861,533 | 37,861,645 | cg06610641 | 37,861,546 |
|    |     |    |            |            |            |            | 402 | 435 | 19 | 38,085,577 | 38,085,746 | cg27321876 | 38,085,706 |
|    |     |    |            |            |            |            | 402 | 435 | 19 | 38,085,577 | 38,085,746 | cg16708785 | 38,085,709 |
|    |     |    |            |            |            |            | 403 | 436 | 19 | 45,654,162 | 45,654,321 | cg27052073 | 45,654,213 |
|    |     |    |            |            |            |            | 404 | 437 | 19 | 45,901,506 | 45,901,703 | cg08512167 | 45,901,567 |
|    |     |    |            |            |            |            | 404 | 437 | 19 | 45,901,506 | 45,901,703 | cg13645732 | 45,901,649 |
|    |     |    |            |            |            |            | 405 | 438 | 19 | 46,180,196 | 46,180,355 | cg18642271 | 46,180,314 |
|    |     |    |            |            |            |            | 405 | 439 | 19 | 46,180,306 | 46,180,440 | cg18642271 | 46,180,314 |
|    |     |    |            |            |            |            | 405 | 439 | 19 | 46,180,306 | 46,180,440 | cg17144108 | 46,180,412 |
|    |     |    |            |            |            |            | 406 | 440 | 19 | 46,318,696 | 46,318,892 | cg27118825 | 46,318,748 |
|    |     |    |            |            |            |            | 406 | 440 | 19 | 46,318,696 | 46,318,892 | cg04379348 | 46,318,762 |
|    |     |    |            |            |            |            | 407 | 441 | 19 | 47,923,301 | 47,923,461 | cg07478208 | 47,923,331 |
|    |     |    |            |            |            |            | 407 | 441 | 19 | 47,923,301 | 47,923,461 | cg17910813 | 47,923,387 |
|    |     |    |            |            |            |            | 408 | 442 | 19 | 48,918,066 | 48,918,187 | cg15779837 | 48,918,116 |
|    |     |    |            |            |            |            | 409 | 443 | 19 | 54,377,144 | 54,377,342 | cg18054632 | 54,377,302 |
|    |     |    |            |            |            |            | 409 | 444 | 19 | 54,377,302 | 54,377,463 | cg18691133 | 54,377,440 |
|    |     |    |            |            |            |            | 410 | 445 | 19 | 58,514,764 | 58,514,943 | cg05377415 | 58,514,816 |
|    |     |    |            |            |            |            | 410 | 445 | 19 | 58,514,764 | 58,514,943 | cg27295481 | 58,514,839 |
|    |     |    |            |            |            |            | 411 | 446 | 20 | 271,313    | 271,469    | cg11991627 | 271,345    |
|    |     |    |            |            |            |            | 411 | 446 | 20 | 271,313    | 271,469    | cg23989297 | 271,347    |
|    |     |    |            |            |            |            | 411 | 446 | 20 | 271,313    | 271,469    | cg17441724 | 271,417    |
|    |     |    |            |            |            |            | 411 | 446 | 20 | 271,313    | 271,469    | cg25232745 | 271,422    |
|    |     |    |            |            |            |            | 411 | 446 | 20 | 271,313    | 271,469    | cg06440615 | 271,425    |
|    |     |    |            |            |            |            | 411 | 446 | 20 | 271,313    | 271,469    | cg25031040 | 271,432    |
|    |     |    |            |            |            |            | 412 | 447 | 20 | 304,008    | 304,179    | cg01822050 | 304,156    |
|    |     |    |            |            |            |            | 413 | 448 | 20 | 2,508,885  | 2,509,043  | cg07545427 | 2,508,981  |
|    |     |    |            |            |            |            | 414 | 449 | 20 | 20,349,139 | 20,349,565 | cg13326227 | 20,349,168 |
|    |     |    |            |            |            |            | 414 | 449 | 20 | 20,349,139 | 20,349,565 | cg00648301 | 20,349,241 |
|    |     |    |            |            |            |            | 415 | 450 | 20 | 24,449,631 | 24,449,790 | cg05347927 | 24,449,668 |
|    |     |    |            |            |            |            | 415 | 450 | 20 | 24,449,631 | 24,449,790 | cg22479299 | 24,449,704 |
|    |     |    |            |            |            |            | 415 | 450 | 20 | 24,449,631 | 24,449,790 | cg02997755 | 24,449,734 |
|    |     |    |            |            |            |            | 415 | 450 | 20 | 24,449,631 | 24,449,790 | cg22452236 | 24,449,760 |
|    |     |    |            |            |            |            | 416 | 451 | 20 | 24,450,260 | 24,450,404 | cg09623400 | 24,450,353 |
|    |     |    |            |            |            |            | 416 | 451 | 20 | 24,450,260 | 24,450,404 | cg19654195 | 24,450,361 |
|    |     |    |            |            |            |            | 417 | 452 | 20 | 32,378,120 | 32,378,279 | cg01554089 | 32,378,171 |
|    |     |    |            |            |            |            | 418 | 453 | 20 | 34,099,423 | 34,099,569 | cg04070427 | 34,099,511 |
|    |     |    |            |            |            |            | 419 | 454 | 20 | 36,013,363 | 36,013,478 | cg23635789 | 36,013,428 |
|    |     |    |            |            |            |            | 420 | 455 | 20 | 36,153,843 | 36,153,992 | cg03226872 | 36,153,865 |
|    |     |    |            |            |            |            | 420 | 455 | 20 | 36,153,843 | 36,153,992 | cg17271585 | 36,153,947 |

|     |     |    |             |             |            |             |
|-----|-----|----|-------------|-------------|------------|-------------|
| 421 | 456 | 20 | 42,142,967  | 42,143,118  | cg22601123 | 42,142,995  |
| 421 | 456 | 20 | 42,142,967  | 42,143,118  | cg22330467 | 42,143,015  |
| 421 | 456 | 20 | 42,142,967  | 42,143,118  | cg14306330 | 42,143,045  |
| 421 | 456 | 20 | 42,142,967  | 42,143,118  | cg01071811 | 42,143,080  |
| 421 | 456 | 20 | 42,142,967  | 42,143,118  | cg02611863 | 42,143,096  |
| 422 | 457 | 20 | 43,161,193  | 43,161,315  | cg00726046 | 43,161,260  |
| 423 | 458 | 20 | 44,782,043  | 44,782,220  | cg11206526 | 44,782,126  |
| 424 | 459 | 20 | 48,728,592  | 48,728,758  | cg13046524 | 48,728,642  |
| 425 | 460 | 20 | 50,158,137  | 50,158,289  | cg02561912 | 50,158,202  |
| 426 | 461 | 20 | 56,881,887  | 56,882,037  | cg21532801 | 56,881,949  |
| 427 | 462 | 20 | 58,586,763  | 58,586,907  | cg02423105 | 58,586,819  |
| 428 | 463 | 20 | 60,701,221  | 60,701,380  | cg06096175 | 60,701,350  |
| 428 | 464 | 20 | 60,701,310  | 60,701,504  | cg06096175 | 60,701,350  |
| 429 | 465 | 20 | 61,803,852  | 61,804,017  | cg13590979 | 61,803,906  |
| 430 | 466 | 20 | 62,124,844  | 62,125,003  | cg14636268 | 62,124,947  |
| 431 | 467 | 21 | 30,365,345  | 30,365,502  | cg01446372 | 30,365,398  |
| 431 | 467 | 21 | 30,365,345  | 30,365,502  | cg23864210 | 30,365,465  |
| 432 | 468 | 21 | 34,398,760  | 34,398,899  | cg14843922 | 34,398,849  |
| 433 | 469 | 21 | 36,412,349  | 36,412,507  | cg16071713 | 36,412,456  |
| 434 | 470 | 21 | 43,098,798  | 43,098,952  | cg20206277 | 43,098,901  |
| 435 | 471 | 21 | 47,784,037  | 47,784,223  | cg05931989 | 47,784,119  |
| 436 | 472 | 22 | 19,748,761  | 19,748,948  | cg02583938 | 19,748,777  |
| 436 | 472 | 22 | 19,748,761  | 19,748,948  | cg16332936 | 19,748,910  |
| 436 | 472 | 22 | 19,748,761  | 19,748,948  | cg16113681 | 19,748,925  |
| 436 | 473 | 22 | 19,748,917  | 19,749,020  | cg16113681 | 19,748,925  |
| 437 | 474 | 22 | 21,333,564  | 21,333,718  | cg06985578 | 21,333,706  |
| 438 | 475 | 22 | 30,723,129  | 30,723,265  | cg10574851 | 30,723,212  |
| 438 | 475 | 22 | 30,723,129  | 30,723,265  | cg24944736 | 30,723,217  |
| 439 | 476 | 22 | 39,414,416  | 39,414,543  | cg27451450 | 39,414,471  |
| 440 | 477 | 22 | 41,183,411  | 41,183,603  | cg03888645 | 41,183,474  |
| 441 | 478 | 22 | 42,949,775  | 42,949,924  | cg04416895 | 42,949,810  |
| 441 | 478 | 22 | 42,949,775  | 42,949,924  | cg08157579 | 42,949,829  |
| 442 | 479 | 22 | 42,976,088  | 42,976,208  | cg08094784 | 42,976,149  |
| 443 | 480 | 22 | 46,831,936  | 46,832,056  | cg17551295 | 46,831,988  |
| 444 | 481 | 22 | 50,435,357  | 50,435,476  | cg18730511 | 50,435,413  |
| 445 | 482 | X  | 11,683,507  | 11,683,626  | cg21880156 | 11,683,548  |
| 445 | 482 | X  | 11,683,507  | 11,683,626  | cg18036967 | 11,683,625  |
| 445 | 483 | X  | 11,683,601  | 11,683,783  | cg18036967 | 11,683,625  |
| 446 | 484 | X  | 23,017,880  | 23,018,046  | cg21908878 | 23,017,887  |
| 446 | 484 | X  | 23,017,880  | 23,018,046  | cg14020146 | 23,017,980  |
| 446 | 484 | X  | 23,017,880  | 23,018,046  | cg26009591 | 23,017,991  |
| 446 | 484 | X  | 23,017,880  | 23,018,046  | cg08264725 | 23,018,003  |
| 446 | 484 | X  | 23,017,880  | 23,018,046  | cg27124742 | 23,018,006  |
| 446 | 484 | X  | 23,017,880  | 23,018,046  | cg22052586 | 23,018,036  |
| 447 | 485 | X  | 30,904,301  | 30,904,451  | cg05204193 | 30,904,380  |
| 448 | 486 | X  | 66,765,192  | 66,765,368  | cg03096488 | 66,765,289  |
| 449 | 487 | X  | 69,355,989  | 69,356,149  | cg00713642 | 69,356,087  |
| 450 | 488 | X  | 69,509,620  | 69,509,767  | cg18030003 | 69,509,686  |
| 450 | 488 | X  | 69,509,620  | 69,509,767  | cg17206029 | 69,509,694  |
| 450 | 488 | X  | 69,509,620  | 69,509,767  | cg00213957 | 69,509,697  |
| 450 | 488 | X  | 69,509,620  | 69,509,767  | cg13622893 | 69,509,727  |
| 451 | 489 | X  | 69,673,743  | 69,673,865  | cg01448525 | 69,673,805  |
| 452 | 490 | X  | 70,316,329  | 70,316,487  | cg18288715 | 70,316,444  |
| 453 | 491 | X  | 73,513,315  | 73,513,500  | cg10575170 | 73,513,412  |
| 453 | 491 | X  | 73,513,315  | 73,513,500  | cg07823797 | 73,513,418  |
| 453 | 491 | X  | 73,513,315  | 73,513,500  | cg19487868 | 73,513,453  |
| 453 | 491 | X  | 73,513,315  | 73,513,500  | cg04667267 | 73,513,464  |
| 454 | 492 | X  | 75,249,487  | 75,249,685  | cg08103876 | 75,249,519  |
| 454 | 492 | X  | 75,249,487  | 75,249,685  | cg03236853 | 75,249,539  |
| 455 | 493 | X  | 117,629,107 | 117,629,286 | cg27062326 | 117,629,163 |
| 456 | 494 | X  | 118,750,201 | 118,750,354 | cg17385225 | 118,750,273 |
| 457 | 495 | X  | 135,333,537 | 135,333,704 | cg07446674 | 135,333,561 |
| 457 | 495 | X  | 135,333,537 | 135,333,704 | cg27047283 | 135,333,567 |
| 457 | 495 | X  | 135,333,537 | 135,333,704 | cg24347720 | 135,333,661 |
| 457 | 495 | X  | 135,333,537 | 135,333,704 | cg13304035 | 135,333,674 |
| 457 | 495 | X  | 135,333,537 | 135,333,704 | cg13243544 | 135,333,698 |
| 458 | 496 | X  | 136,115,950 | 136,116,119 | cg14463432 | 136,115,991 |
| 459 | 497 | X  | 138,287,387 | 138,287,578 | cg06981242 | 138,287,529 |
| 459 | 497 | X  | 138,287,387 | 138,287,578 | cg08349204 | 138,287,578 |
| 460 | 498 | X  | 139,587,254 | 139,587,372 | cg23862713 | 139,587,270 |
| 460 | 498 | X  | 139,587,254 | 139,587,372 | cg26369916 | 139,587,279 |
| 460 | 498 | X  | 139,587,254 | 139,587,372 | cg07929406 | 139,587,304 |
| 460 | 498 | X  | 139,587,254 | 139,587,372 | cg03202526 | 139,587,311 |
| 460 | 498 | X  | 139,587,254 | 139,587,372 | cg11638117 | 139,587,335 |
| 460 | 498 | X  | 139,587,254 | 139,587,372 | cg11409998 | 139,587,372 |
| 460 | 499 | X  | 139,587,337 | 139,587,500 | cg11409998 | 139,587,372 |
| 460 | 499 | X  | 139,587,337 | 139,587,500 | cg24432916 | 139,587,479 |
| 461 | 500 | X  | 144,903,592 | 144,903,733 | cg24880787 | 144,903,661 |
| 461 | 500 | X  | 144,903,592 | 144,903,733 | cg19332075 | 144,903,691 |
| 462 | 501 | X  | 151,143,173 | 151,143,343 | cg18748981 | 151,143,213 |
| 462 | 501 | X  | 151,143,173 | 151,143,343 | cg25528646 | 151,143,302 |

**Table S2. Summary sequencing and methylation statistics for the (A) SC panel and (B) BM panel.** Summary statistics regarding trimming and mapping of sequencing reads, as well as methylation levels are reported. The data sets were analyzed as described in the Methods section.

**(A) SC Panel**

|                                                                                     | BL<br>100 | BL<br>250 | BL<br>1000 | BL<br>1500 | BL<br>10-A | BL<br>50-A | BL<br>100-A | BL<br>250-A | SCL<br>100 | SCL<br>250 | SCL<br>1000 | SCL<br>1500 | SCL<br>10-A | SCL<br>50-A | SCL<br>100-A | SCL<br>250-A |
|-------------------------------------------------------------------------------------|-----------|-----------|------------|------------|------------|------------|-------------|-------------|------------|------------|-------------|-------------|-------------|-------------|--------------|--------------|
| <b>Raw sequencing read quality filtering (fastq-mcf)</b>                            |           |           |            |            |            |            |             |             |            |            |             |             |             |             |              |              |
| Total number of sequencing reads                                                    | 305,590   | 253,255   | 273,603    | 215,406    | 190,386    | 448,017    | 466,972     | 535,264     | 324,934    | 404,680    | 234,005     | 243,583     | 381,979     | 372,326     | 425,036      | 456,764      |
| Number of discarded low-quality reads                                               | 20,128    | 15,497    | 13,564     | 7,548      | 33,127     | 64,864     | 64,978      | 49,528      | 23,697     | 30,245     | 13,826      | 11,846      | 68,043      | 46,823      | 68,224       | 14,009       |
| <b>Final alignment report (Bismark)</b>                                             |           |           |            |            |            |            |             |             |            |            |             |             |             |             |              |              |
| Total number of sequencing reads analyzed                                           | 285,462   | 237,758   | 260,039    | 207,858    | 157,259    | 383,153    | 401,994     | 485,736     | 301,237    | 374,435    | 220,179     | 231,737     | 313,936     | 325,503     | 356,812      | 442,755      |
| Sequence pairs with a unique best hit                                               | 50,950    | 52,449    | 88,158     | 77,987     | 5,537      | 50,661     | 47,885      | 72,498      | 30,035     | 59,954     | 61,605      | 65,520      | 14,519      | 11,948      | 36,301       | 52,171       |
| CT/GA/CT (converted top strand)                                                     | 25,841    | 26,950    | 45,388     | 40,886     | 2,990      | 24,954     | 24,425      | 38,147      | 16,140     | 29,269     | 30,902      | 33,186      | 8,445       | 5,933       | 18,655       | 26,929       |
| GA/CT/CT (compl. to converted top strand)                                           | 812       | 571       | 1,146      | 586        | 238        | 2,212      | 2,048       | 3,018       | 360        | 897        | 656         | 517         | 603         | 981         | 2,205        | 1,413        |
| GA/CT/GA (compl. to converted bottom strand)                                        | 23,766    | 24,498    | 41,158     | 36,164     | 1,422      | 22,489     | 20,505      | 30,283      | 13,101     | 29,143     | 29,572      | 31,403      | 4,048       | 3,733       | 14,339       | 23,367       |
| CT/GA/GA (converted bottom strand)                                                  | 531       | 430       | 466        | 351        | 887        | 1,006      | 907         | 1,050       | 434        | 645        | 475         | 414         | 1,423       | 1,301       | 1,102        | 462          |
| Mapping efficiency                                                                  | 17.80%    | 22.10%    | 33.90%     | 37.50%     | 3.50%      | 13.20%     | 11.90%      | 14.90%      | 10.00%     | 16.00%     | 28.00%      | 28.30%      | 4.60%       | 3.70%       | 10.20%       | 11.80%       |
| Sequence pairs with no alignments under any condition                               | 230,296   | 182,088   | 169,151    | 128,073    | 147,169    | 323,119    | 345,266     | 403,760     | 265,673    | 308,019    | 155,755     | 163,526     | 289,682     | 305,764     | 311,638      | 387,963      |
| Sequence pairs that did not map uniquely                                            | 4,216     | 3,221     | 2,730      | 1,798      | 4,553      | 9,373      | 8,843       | 9,478       | 5,529      | 6,462      | 2,819       | 2,691       | 9,735       | 7,791       | 8,873        | 2,621        |
| Sequence pairs that were discarded, because genomic sequence could not be extracted | 0         | 0         | 0          | 0          | 0          | 0          | 0           | 0           | 0          | 0          | 0           | 0           | 0           | 0           | 0            | 0            |
| <b>Targeted sequencing statistics (TEQC)</b>                                        |           |           |            |            |            |            |             |             |            |            |             |             |             |             |              |              |
| Number of sequencing reads used                                                     | 101,900   | 104,898   | 176,316    | 155,974    | 11,074     | 101,322    | 95,770      | 144,996     | 60,070     | 119,908    | 123,210     | 131,040     | 29,038      | 23,896      | 72,602       | 104,342      |
| Fraction of aligned reads that overlap with any target region                       | 0.947     | 0.958     | 0.961      | 0.974      | 0.660      | 0.871      | 0.869       | 0.876       | 0.930      | 0.943      | 0.962       | 0.968       | 0.743       | 0.642       | 0.819        | 0.918        |
| <b>Final cytosine methylation report (Bismark)</b>                                  |           |           |            |            |            |            |             |             |            |            |             |             |             |             |              |              |
| Total number of C's analyzed                                                        | 1,755,662 | 1,809,211 | 3,142,878  | 2,791,484  | 88,718     | 1,486,819  | 1,440,186   | 2,304,494   | 938,487    | 1,979,953  | 2,138,844   | 2,322,030   | 283,795     | 245,177     | 968,769      | 1,726,513    |
| Total methylated C's in CpG context                                                 | 60,894    | 64,307    | 112,329    | 99,370     | 2,006      | 50,213     | 54,278      | 80,600      | 96,638     | 208,548    | 239,126     | 266,576     | 11,008      | 9,712       | 61,519       | 138,007      |
| Total methylated C's in CHG context                                                 | 4,521     | 4,703     | 7,691      | 6,379      | 352        | 2,870      | 4,833       | 5,066       | 2,686      | 5,171      | 4,082       | 4,707       | 747         | 811         | 1,760        | 4,370        |
| Total methylated C's in CHH context                                                 | 23,504    | 21,285    | 25,009     | 19,679     | 19,638     | 41,267     | 36,018      | 42,676      | 20,708     | 29,434     | 16,916      | 18,296      | 40,594      | 37,655      | 34,924       | 22,195       |
| Total C to T conversions in CpG context                                             | 264,855   | 285,653   | 472,920    | 457,113    | 4,648      | 159,028    | 157,429     | 268,765     | 69,294     | 142,078    | 158,502     | 174,856     | 17,444      | 13,312      | 55,533       | 133,988      |
| Total C to T conversions in CHG context                                             | 515,501   | 540,786   | 937,339    | 849,569    | 16,818     | 424,062    | 410,229     | 659,168     | 280,052    | 587,904    | 638,813     | 701,058     | 65,738      | 55,388      | 270,147      | 510,946      |
| Total C to T conversions in CHH context                                             | 886,387   | 892,477   | 1,587,590  | 1,359,374  | 45,256     | 809,379    | 777,399     | 1,248,219   | 469,109    | 1,006,818  | 1,081,405   | 1,156,537   | 148,264     | 128,299     | 544,886      | 917,007      |
| C methylated in CpG context                                                         | 18.70%    | 18.40%    | 19.20%     | 17.90%     | 30.10%     | 24.00%     | 25.60%      | 23.10%      | 58.20%     | 59.50%     | 60.10%      | 60.40%      | 38.70%      | 42.20%      | 52.60%       | 50.70%       |
| C methylated in CHG context                                                         | 0.90%     | 0.90%     | 0.80%      | 0.70%      | 2.10%      | 0.70%      | 1.20%       | 0.80%       | 0.90%      | 0.90%      | 0.60%       | 0.70%       | 1.10%       | 1.40%       | 0.60%        | 0.80%        |
| C methylated in CHH context                                                         | 2.60%     | 2.30%     | 1.60%      | 1.40%      | 30.30%     | 4.90%      | 4.40%       | 3.30%       | 4.20%      | 2.80%      | 1.50%       | 1.60%       | 21.50%      | 22.70%      | 6.00%        | 2.40%        |

|                                                          | FFPE<br>100 | FFPE<br>250 | FFPE<br>1000 | FFPE<br>1500 | FFPE<br>10-A | FFPE<br>50-A | FFPE<br>100-A | FFPE<br>250-A |
|----------------------------------------------------------|-------------|-------------|--------------|--------------|--------------|--------------|---------------|---------------|
| <b>Raw sequencing read quality filtering (fastq-mcf)</b> |             |             |              |              |              |              |               |               |
| Total number of sequencing reads                         | 197,172     | 190,892     | 97,956       | 54,414       | 320,858      | 274,304      | 452,992       | 296,896       |
| Number of discarded low-quality reads                    | 18,754      | 14,777      | 8,778        | 5,222        | 50,972       | 51,514       | 49,175        | 29,535        |
| <b>Final alignment report (Bismark)</b>                  |             |             |              |              |              |              |               |               |
| Total number of sequencing reads analyzed                | 178,418     | 176,115     | 89,178       | 49,192       | 269,886      | 222,790      | 403,817       | 267,361       |
| Sequence pairs with a unique best hit                    | 8,607       | 8,394       | 4,377        | 3,912        | 9,570        | 8,974        | 9,914         | 6,443         |
| CT/GA/CT (converted top strand)                          | 5,156       | 4,800       | 2,419        | 2,039        | 5,752        | 5,716        | 5,703         | 3,363         |

|                                                                                     |         |         |         |         |         |         |         |         |
|-------------------------------------------------------------------------------------|---------|---------|---------|---------|---------|---------|---------|---------|
| GA/CT/CT (compl. to converted top strand)                                           | 180     | 220     | 100     | 115     | 267     | 211     | 519     | 642     |
| GA/CT/GA (compl. to converted bottom strand)                                        | 2,856   | 3,046   | 1,637   | 1,615   | 2,594   | 2,305   | 2,702   | 1,706   |
| CT/GA/GA (converted bottom strand)                                                  | 415     | 328     | 221     | 143     | 957     | 742     | 990     | 732     |
| Mapping efficiency                                                                  | 4.80%   | 4.80%   | 4.90%   | 8.00%   | 3.50%   | 4.00%   | 2.50%   | 2.40%   |
| Sequence pairs with no alignments under any condition                               | 164,887 | 163,706 | 82,577  | 44,172  | 251,252 | 205,615 | 385,703 | 255,696 |
| Sequence pairs that did not map uniquely                                            | 4,924   | 4,015   | 2,224   | 1,108   | 9,064   | 8,201   | 8,200   | 5,222   |
| Sequence pairs that were discarded, because genomic sequence could not be extracted | 0       | 0       | 0       | 0       | 0       | 0       | 0       | 0       |
| <b>Targeted sequencing statistics (TEQC)</b>                                        |         |         |         |         |         |         |         |         |
| Number of sequencing reads used                                                     | 17,214  | 16,788  | 8,754   | 7,824   | 19,140  | 17,948  | 19,828  | 12,886  |
| Fraction of aligned reads that overlap with any target region                       | 0.837   | 0.841   | 0.814   | 0.845   | 0.713   | 0.748   | 0.666   | 0.598   |
| <b>Final cytosine methylation report (Bismark)</b>                                  |         |         |         |         |         |         |         |         |
| Total number of C's analyzed                                                        | 221,077 | 229,836 | 115,732 | 115,309 | 137,560 | 120,540 | 178,147 | 124,523 |
| Total methylated C's in CpG context                                                 | 8,041   | 8,729   | 4,522   | 4,097   | 2,786   | 2,777   | 8,295   | 6,532   |
| Total methylated C's in CHG context                                                 | 507     | 722     | 341     | 274     | 399     | 346     | 642     | 647     |
| Total methylated C's in CHH context                                                 | 14,591  | 11,803  | 7,604   | 4,325   | 31,410  | 24,993  | 34,373  | 27,797  |
| Total C to T conversions in CpG context                                             | 21,305  | 23,207  | 13,108  | 13,443  | 4,359   | 3,785   | 7,168   | 5,151   |
| Total C to T conversions in CHG context                                             | 57,517  | 64,522  | 31,638  | 32,685  | 27,563  | 24,942  | 36,690  | 23,436  |
| Total C to T conversions in CHH context                                             | 119,116 | 120,853 | 58,519  | 60,485  | 71,043  | 63,697  | 90,979  | 60,960  |
| C methylated in CpG context                                                         | 27.40%  | 27.30%  | 25.60%  | 23.40%  | 39.00%  | 42.30%  | 53.60%  | 55.90%  |
| C methylated in CHG context                                                         | 0.90%   | 1.10%   | 1.10%   | 0.80%   | 1.40%   | 1.40%   | 1.70%   | 2.70%   |
| C methylated in CHH context                                                         | 10.90%  | 8.90%   | 11.50%  | 6.70%   | 30.70%  | 28.20%  | 27.40%  | 31.30%  |

## (B) BM Panel

|                                                                                     | BL<br>100 | BL<br>250 | BL<br>1000 | BL<br>1500 | BL<br>10-A | BL<br>50-A | BL<br>100-A | BL<br>250-A | SCL<br>100 | SCL<br>250 | SCL<br>1000 | SCL<br>1500 | SCL<br>10-A | SCL<br>50-A | SCL<br>100-A | SCL<br>250-A |
|-------------------------------------------------------------------------------------|-----------|-----------|------------|------------|------------|------------|-------------|-------------|------------|------------|-------------|-------------|-------------|-------------|--------------|--------------|
| <b>Raw sequencing read quality filtering (fastq-mcf)</b>                            |           |           |            |            |            |            |             |             |            |            |             |             |             |             |              |              |
| Total number of sequencing reads                                                    | 582,276   | 804,368   | 429,851    | 378,921    | 854,499    | 430,215    | 759,866     | 1,053,732   | 476,191    | 673,353    | 453,915     | 283,451     | 364,617     | 600,335     | 605,800      | 1,054,642    |
| Number of discarded low-quality reads                                               | 22,617    | 30,032    | 11,855     | 7,929      | 69,394     | 34,255     | 52,774      | 59,765      | 24,612     | 29,870     | 14,475      | 7,983       | 37,056      | 58,337      | 52,120       | 76,018       |
| <b>Final alignment report (Bismark)</b>                                             |           |           |            |            |            |            |             |             |            |            |             |             |             |             |              |              |
| Total number of sequencing reads analyzed                                           | 559,659   | 774,336   | 417,996    | 370,992    | 785,105    | 395,960    | 707,092     | 993,967     | 451,579    | 643,483    | 439,440     | 275,468     | 327,561     | 541,998     | 553,680      | 978,624      |
| Sequence pairs with a unique best hit                                               | 65,766    | 101,257   | 121,647    | 134,812    | 24,239     | 13,951     | 57,757      | 142,385     | 30,992     | 83,346     | 116,942     | 90,278      | 15,944      | 26,081      | 46,530       | 112,189      |
| CT/GA/CT (converted top strand)                                                     | 31,448    | 48,727    | 59,434     | 65,413     | 5,595      | 4,170      | 23,418      | 64,652      | 13,517     | 38,180     | 54,973      | 43,087      | 4,977       | 8,732       | 18,851       | 50,189       |
| GA/CT/CT (compl. to converted top strand)                                           | 1,867     | 2,762     | 1,582      | 1,478      | 2,965      | 1,339      | 2,482       | 3,563       | 1,408      | 2,474      | 1,614       | 987         | 997         | 1,752       | 1,936        | 3,581        |
| GA/CT/GA (compl. to converted bottom strand)                                        | 27,997    | 43,923    | 57,794     | 65,587     | 8,469      | 5,066      | 25,116      | 64,919      | 12,284     | 37,522     | 57,082      | 44,245      | 5,952       | 9,316       | 19,908       | 48,365       |
| CT/GA/GA (converted bottom strand)                                                  | 4,454     | 5,845     | 2,837      | 2,334      | 7,210      | 3,376      | 6,741       | 9,251       | 3,783      | 5,170      | 3,273       | 1,959       | 4,018       | 6,281       | 5,835        | 10,054       |
| Mapping efficiency                                                                  | 11.80%    | 13.10%    | 29.10%     | 36.30%     | 3.10%      | 3.50%      | 8.20%       | 14.30%      | 6.90%      | 13.00%     | 26.60%      | 32.80%      | 4.90%       | 4.80%       | 8.40%        | 11.50%       |
| Sequence pairs with no alignments under any condition                               | 480,871   | 655,652   | 288,720    | 229,817    | 733,782    | 368,840    | 630,936     | 828,445     | 408,373    | 543,673    | 313,012     | 180,031     | 301,577     | 498,888     | 491,209      | 841,144      |
| Sequence pairs that did not map uniquely                                            | 13,022    | 17,427    | 7,629      | 6,363      | 27,084     | 13,169     | 18,399      | 23,137      | 12,214     | 16,464     | 9,486       | 5,159       | 10,040      | 17,029      | 15,941       | 25,291       |
| Sequence pairs that were discarded, because genomic sequence could not be extracted | 0         | 0         | 0          | 0          | 0          | 0          | 0           | 0           | 0          | 0          | 0           | 0           | 0           | 0           | 0            | 0            |
| <b>Targeted sequencing statistics (TEQC)</b>                                        |           |           |            |            |            |            |             |             |            |            |             |             |             |             |              |              |
| Number of sequencing reads used                                                     | 131,532   | 202,514   | 243,294    | 269,624    | 48,478     | 27,902     | 115,514     | 284,770     | 61,984     | 166,692    | 233,884     | 180,556     | 31,888      | 52,162      | 93,060       | 224,378      |
| Fraction of aligned reads that overlap with any target region                       | 0.730     | 0.760     | 0.888      | 0.912      | 0.115      | 0.180      | 0.590       | 0.750       | 0.546      | 0.742      | 0.873       | 0.899       | 0.301       | 0.286       | 0.583        | 0.687        |
| <b>Final cytosine methylation report (Bismark)</b>                                  |           |           |            |            |            |            |             |             |            |            |             |             |             |             |              |              |
| Total number of C's analyzed                                                        | 2,231,032 | 3,475,046 | 4,274,365  | 4,801,645  | 482,071    | 297,007    | 1,797,890   | 4,706,481   | 940,575    | 2,774,485  | 4,042,875   | 3,165,998   | 392,178     | 625,554     | 1,401,229    | 3,537,416    |
| Total methylated C's in CpG context                                                 | 136,827   | 211,382   | 248,228    | 272,026    | 8,619      | 8,548      | 107,597     | 280,668     | 68,985     | 225,261    | 331,199     | 264,391     | 15,469      | 26,771      | 101,189      | 252,659      |

|                                         |           |           |           |           |         |         |         |           |         |           |           |           |         |         |         |           |
|-----------------------------------------|-----------|-----------|-----------|-----------|---------|---------|---------|-----------|---------|-----------|-----------|-----------|---------|---------|---------|-----------|
| Total methylated C's in CHG context     | 4,556     | 6,707     | 7,749     | 8,034     | 2,857   | 1,631   | 3,554   | 9,194     | 2,173   | 5,677     | 6,565     | 4,660     | 1,161   | 1,716   | 2,691   | 6,356     |
| Total methylated C's in CHH context     | 88,335    | 123,030   | 59,833    | 48,119    | 224,813 | 107,940 | 156,072 | 189,735   | 96,218  | 123,836   | 71,269    | 39,661    | 112,347 | 172,607 | 142,900 | 220,610   |
| Total C to T conversions in CpG context | 243,117   | 375,397   | 493,633   | 576,172   | 10,774  | 10,426  | 157,013 | 441,440   | 63,987  | 212,005   | 333,917   | 265,317   | 20,322  | 27,843  | 89,924  | 237,358   |
| Total C to T conversions in CHG context | 593,709   | 922,917   | 1,168,209 | 1,320,134 | 38,430  | 37,076  | 445,782 | 1,250,708 | 222,187 | 727,832   | 1,106,767 | 871,985   | 61,944  | 105,902 | 339,741 | 900,274   |
| Total C to T conversions in CHH context | 1,164,488 | 1,835,613 | 2,296,713 | 2,577,160 | 196,578 | 131,386 | 927,872 | 2,534,736 | 487,025 | 1,479,874 | 2,193,158 | 1,719,984 | 180,935 | 290,715 | 724,784 | 1,920,159 |
| C methylated in CpG context             | 36.00%    | 36.00%    | 33.50%    | 32.10%    | 44.40%  | 45.10%  | 40.70%  | 38.90%    | 51.90%  | 51.50%    | 49.80%    | 49.90%    | 43.20%  | 49.00%  | 52.90%  | 51.60%    |
| C methylated in CHG context             | 0.80%     | 0.70%     | 0.70%     | 0.60%     | 6.90%   | 4.20%   | 0.80%   | 0.70%     | 1.00%   | 0.80%     | 0.60%     | 0.50%     | 1.80%   | 1.60%   | 0.80%   | 0.70%     |
| C methylated in CHH context             | 7.10%     | 6.30%     | 2.50%     | 1.80%     | 53.40%  | 45.10%  | 14.40%  | 7.00%     | 16.50%  | 7.70%     | 3.10%     | 2.30%     | 38.30%  | 37.30%  | 16.50%  | 10.30%    |



**Table S3. Primer sequences for the (A) universal PCR and (B) Illumina sequencing reaction.** In the universal PCR, the reverse primers harbored a sample-specific 8-bp barcode. The column ‘Barcode’ provides the reverse complementary DNA sequences of these barcodes, which were used for demultiplexing in the subsequent Illumina sequencing reaction. A total of 96 barcodes (based on Kozarewa I & Turner DJ. *Methods Mol Biol* 2011; 733:279-98) are shown. For the universal PCR using the SC and BM panel, we used the primers M\_rev\_25–48 and M\_rev\_25–40, respectively. For the sequencing reaction on a MiSeq DNA sequencer [Illumina], we used custom Read1 and Read2 primers.

**(A) Universal PCR**

| ID       | Sequence                                                                    | Barcode   |
|----------|-----------------------------------------------------------------------------|-----------|
| U_fwd    | 5'-AATGATACGGCGACCACCGAGATCTACACTCTTTCCCTACACGACGCTCTTCCGATCTCTG            | NA        |
| U_rev_1  | 5'-CAAGCAGAAGACGGCATAACGAGAT-ACAAGCTA-GTGACTGGAGTTCAGACGTGTGCTCTTCCGATCTGAC | TAGCTTGT  |
| U_rev_2  | 5'-CAAGCAGAAGACGGCATAACGAGAT-AAACATCG-GTGACTGGAGTTCAGACGTGTGCTCTTCCGATCTGAC | CGATGTTT  |
| U_rev_3  | 5'-CAAGCAGAAGACGGCATAACGAGAT-ACATTGGC-GTGACTGGAGTTCAGACGTGTGCTCTTCCGATCTGAC | GCCAATGT  |
| U_rev_4  | 5'-CAAGCAGAAGACGGCATAACGAGAT-ACCCTGTG-GTGACTGGAGTTCAGACGTGTGCTCTTCCGATCTGAC | ACAGTGGT  |
| U_rev_5  | 5'-CAAGCAGAAGACGGCATAACGAGAT-AACGTGAT-GTGACTGGAGTTCAGACGTGTGCTCTTCCGATCTGAC | ATCACGTT  |
| U_rev_6  | 5'-CAAGCAGAAGACGGCATAACGAGAT-CGCTGATC-GTGACTGGAGTTCAGACGTGTGCTCTTCCGATCTGAC | GATCAGCG  |
| U_rev_7  | 5'-CAAGCAGAAGACGGCATAACGAGAT-CAGATCTG-GTGACTGGAGTTCAGACGTGTGCTCTTCCGATCTGAC | CAGATCTG  |
| U_rev_8  | 5'-CAAGCAGAAGACGGCATAACGAGAT-ATGCTTAA-GTGACTGGAGTTCAGACGTGTGCTCTTCCGATCTGAC | TTAGGCAT  |
| U_rev_9  | 5'-CAAGCAGAAGACGGCATAACGAGAT-CTGTAGCC-GTGACTGGAGTTCAGACGTGTGCTCTTCCGATCTGAC | GGCTACAG  |
| U_rev_10 | 5'-CAAGCAGAAGACGGCATAACGAGAT-AGTACAAG-GTGACTGGAGTTCAGACGTGTGCTCTTCCGATCTGAC | CTTGTACT  |
| U_rev_11 | 5'-CAAGCAGAAGACGGCATAACGAGAT-CATCAAGT-GTGACTGGAGTTCAGACGTGTGCTCTTCCGATCTGAC | ACTTGTATG |
| U_rev_12 | 5'-CAAGCAGAAGACGGCATAACGAGAT-AGTGGTCA-GTGACTGGAGTTCAGACGTGTGCTCTTCCGATCTGAC | TGACCACT  |
| U_rev_13 | 5'-CAAGCAGAAGACGGCATAACGAGAT-AAACAACA-GTGACTGGAGTTCAGACGTGTGCTCTTCCGATCTGAC | TGGTGTGT  |
| U_rev_14 | 5'-CAAGCAGAAGACGGCATAACGAGAT-AACCGAGA-GTGACTGGAGTTCAGACGTGTGCTCTTCCGATCTGAC | TCTCGGTT  |
| U_rev_15 | 5'-CAAGCAGAAGACGGCATAACGAGAT-AACGCTTA-GTGACTGGAGTTCAGACGTGTGCTCTTCCGATCTGAC | TAAGCGTT  |
| U_rev_16 | 5'-CAAGCAGAAGACGGCATAACGAGAT-AAGACGGA-GTGACTGGAGTTCAGACGTGTGCTCTTCCGATCTGAC | TCCGCTTT  |
| U_rev_17 | 5'-CAAGCAGAAGACGGCATAACGAGAT-AAGGTACA-GTGACTGGAGTTCAGACGTGTGCTCTTCCGATCTGAC | TGTACCTT  |
| U_rev_18 | 5'-CAAGCAGAAGACGGCATAACGAGAT-ACTATGCA-GTGACTGGAGTTCAGACGTGTGCTCTTCCGATCTGAC | TTCTGTGT  |
| U_rev_19 | 5'-CAAGCAGAAGACGGCATAACGAGAT-ACAGCAGA-GTGACTGGAGTTCAGACGTGTGCTCTTCCGATCTGAC | TCTGCTGT  |
| U_rev_20 | 5'-CAAGCAGAAGACGGCATAACGAGAT-ACCTCAA-GTGACTGGAGTTCAGACGTGTGCTCTTCCGATCTGAC  | TTGGAGGT  |
| U_rev_21 | 5'-CAAGCAGAAGACGGCATAACGAGAT-ACGCTCGA-GTGACTGGAGTTCAGACGTGTGCTCTTCCGATCTGAC | TCGAGCGT  |
| U_rev_22 | 5'-CAAGCAGAAGACGGCATAACGAGAT-ACGTATCA-GTGACTGGAGTTCAGACGTGTGCTCTTCCGATCTGAC | TGATACGT  |
| U_rev_23 | 5'-CAAGCAGAAGACGGCATAACGAGAT-ACTATGCA-GTGACTGGAGTTCAGACGTGTGCTCTTCCGATCTGAC | TGCATAGT  |
| U_rev_24 | 5'-CAAGCAGAAGACGGCATAACGAGAT-AGAGTCAA-GTGACTGGAGTTCAGACGTGTGCTCTTCCGATCTGAC | TTGACTCT  |
| U_rev_25 | 5'-CAAGCAGAAGACGGCATAACGAGAT-AGATCGCA-GTGACTGGAGTTCAGACGTGTGCTCTTCCGATCTGAC | TGCGATCT  |
| U_rev_26 | 5'-CAAGCAGAAGACGGCATAACGAGAT-AGCAGGAA-GTGACTGGAGTTCAGACGTGTGCTCTTCCGATCTGAC | TTCTGCTT  |
| U_rev_27 | 5'-CAAGCAGAAGACGGCATAACGAGAT-AGTCACTA-GTGACTGGAGTTCAGACGTGTGCTCTTCCGATCTGAC | TAGTGACT  |
| U_rev_28 | 5'-CAAGCAGAAGACGGCATAACGAGAT-ATCCTGTA-GTGACTGGAGTTCAGACGTGTGCTCTTCCGATCTGAC | TACAGGAT  |
| U_rev_29 | 5'-CAAGCAGAAGACGGCATAACGAGAT-ATTGAGGA-GTGACTGGAGTTCAGACGTGTGCTCTTCCGATCTGAC | TCCTCAAT  |
| U_rev_30 | 5'-CAAGCAGAAGACGGCATAACGAGAT-CAACCACA-GTGACTGGAGTTCAGACGTGTGCTCTTCCGATCTGAC | TGTGGTTG  |
| U_rev_31 | 5'-CAAGCAGAAGACGGCATAACGAGAT-CAAGACTA-GTGACTGGAGTTCAGACGTGTGCTCTTCCGATCTGAC | TAGTCTTG  |
| U_rev_32 | 5'-CAAGCAGAAGACGGCATAACGAGAT-CAATGGAA-GTGACTGGAGTTCAGACGTGTGCTCTTCCGATCTGAC | TTCCATTG  |
| U_rev_33 | 5'-CAAGCAGAAGACGGCATAACGAGAT-CACTTCGA-GTGACTGGAGTTCAGACGTGTGCTCTTCCGATCTGAC | TCGAGGTG  |
| U_rev_34 | 5'-CAAGCAGAAGACGGCATAACGAGAT-CAGCGTTA-GTGACTGGAGTTCAGACGTGTGCTCTTCCGATCTGAC | TAACGCTG  |
| U_rev_35 | 5'-CAAGCAGAAGACGGCATAACGAGAT-CATAACAA-GTGACTGGAGTTCAGACGTGTGCTCTTCCGATCTGAC | TTGGTATG  |
| U_rev_36 | 5'-CAAGCAGAAGACGGCATAACGAGAT-CCAGTTCG-GTGACTGGAGTTCAGACGTGTGCTCTTCCGATCTGAC | TGAAGTGG  |
| U_rev_37 | 5'-CAAGCAGAAGACGGCATAACGAGAT-CCGAAGTA-GTGACTGGAGTTCAGACGTGTGCTCTTCCGATCTGAC | TACTCCGG  |
| U_rev_38 | 5'-CAAGCAGAAGACGGCATAACGAGAT-CCGTGAGA-GTGACTGGAGTTCAGACGTGTGCTCTTCCGATCTGAC | TCTCACGG  |
| U_rev_39 | 5'-CAAGCAGAAGACGGCATAACGAGAT-CCTCTGTA-GTGACTGGAGTTCAGACGTGTGCTCTTCCGATCTGAC | TCAGGAGG  |
| U_rev_40 | 5'-CAAGCAGAAGACGGCATAACGAGAT-CGAAGTCA-GTGACTGGAGTTCAGACGTGTGCTCTTCCGATCTGAC | TAAGTTCG  |
| U_rev_41 | 5'-CAAGCAGAAGACGGCATAACGAGAT-CGACTGGA-GTGACTGGAGTTCAGACGTGTGCTCTTCCGATCTGAC | TCCAGTCG  |
| U_rev_42 | 5'-CAAGCAGAAGACGGCATAACGAGAT-CGCATACA-GTGACTGGAGTTCAGACGTGTGCTCTTCCGATCTGAC | TGTATGCG  |
| U_rev_43 | 5'-CAAGCAGAAGACGGCATAACGAGAT-CTCAATGA-GTGACTGGAGTTCAGACGTGTGCTCTTCCGATCTGAC | TCATTGAG  |
| U_rev_44 | 5'-CAAGCAGAAGACGGCATAACGAGAT-CGTAGACA-GTGACTGGAGTTCAGACGTGTGCTCTTCCGATCTGAC | TGGCTCAG  |
| U_rev_45 | 5'-CAAGCAGAAGACGGCATAACGAGAT-CTGGCATA-GTGACTGGAGTTCAGACGTGTGCTCTTCCGATCTGAC | TATGCCAG  |
| U_rev_46 | 5'-CAAGCAGAAGACGGCATAACGAGAT-GAATCTGA-GTGACTGGAGTTCAGACGTGTGCTCTTCCGATCTGAC | TCAGATTC  |
| U_rev_47 | 5'-CAAGCAGAAGACGGCATAACGAGAT-GACTAGTA-GTGACTGGAGTTCAGACGTGTGCTCTTCCGATCTGAC | TACTAGTC  |
| U_rev_48 | 5'-CAAGCAGAAGACGGCATAACGAGAT-GAGCTGAA-GTGACTGGAGTTCAGACGTGTGCTCTTCCGATCTGAC | TTGACGTC  |
| U_rev_49 | 5'-CAAGCAGAAGACGGCATAACGAGAT-GATAGACA-GTGACTGGAGTTCAGACGTGTGCTCTTCCGATCTGAC | TGCTATATC |
| U_rev_50 | 5'-CAAGCAGAAGACGGCATAACGAGAT-GCCACATA-GTGACTGGAGTTCAGACGTGTGCTCTTCCGATCTGAC | TATGTGGC  |
| U_rev_51 | 5'-CAAGCAGAAGACGGCATAACGAGAT-GCGAGTAA-GTGACTGGAGTTCAGACGTGTGCTCTTCCGATCTGAC | TTACTFCG  |
| U_rev_52 | 5'-CAAGCAGAAGACGGCATAACGAGAT-GCTAACCA-GTGACTGGAGTTCAGACGTGTGCTCTTCCGATCTGAC | TCGTTAGC  |

|          |                                                                              |           |
|----------|------------------------------------------------------------------------------|-----------|
| U_rev_53 | 5'-CAAGCAGAAGACGGCATAACGAGAT-GCTCGGTA-GTGACTGGAGTTCAGACGTGTGCTCTTCCGATCTGAC  | TACCGAGC  |
| U_rev_54 | 5'-CAAGCAGAAGACGGCATAACGAGAT-GGAGAACA-GTGACTGGAGTTCAGACGTGTGCTCTTCCGATCTGAC  | TGTTCTCC  |
| U_rev_55 | 5'-CAAGCAGAAGACGGCATAACGAGAT-GGTGCGAA-GTGACTGGAGTTCAGACGTGTGCTCTTCCGATCTGAC  | TTCCGACC  |
| U_rev_56 | 5'-CAAGCAGAAGACGGCATAACGAGAT-GTACGCAA-GTGACTGGAGTTCAGACGTGTGCTCTTCCGATCTGAC  | TTGCGTAC  |
| U_rev_57 | 5'-CAAGCAGAAGACGGCATAACGAGAT-GTCTGTAGA-GTGACTGGAGTTCAGACGTGTGCTCTTCCGATCTGAC | TCTACGAC  |
| U_rev_58 | 5'-CAAGCAGAAGACGGCATAACGAGAT-GTCTGTCA-GTGACTGGAGTTCAGACGTGTGCTCTTCCGATCTGAC  | TGACAGAC  |
| U_rev_59 | 5'-CAAGCAGAAGACGGCATAACGAGAT-GTGTCTTA-GTGACTGGAGTTCAGACGTGTGCTCTTCCGATCTGAC  | TAGAACAC  |
| U_rev_60 | 5'-CAAGCAGAAGACGGCATAACGAGAT-TAGGATGA-GTGACTGGAGTTCAGACGTGTGCTCTTCCGATCTGAC  | TCATCCTA  |
| U_rev_61 | 5'-CAAGCAGAAGACGGCATAACGAGAT-TATCAGCA-GTGACTGGAGTTCAGACGTGTGCTCTTCCGATCTGAC  | TGCTGATA  |
| U_rev_62 | 5'-CAAGCAGAAGACGGCATAACGAGAT-TCCGTCTA-GTGACTGGAGTTCAGACGTGTGCTCTTCCGATCTGAC  | TAGACGGA  |
| U_rev_63 | 5'-CAAGCAGAAGACGGCATAACGAGAT-TCTTCACA-GTGACTGGAGTTCAGACGTGTGCTCTTCCGATCTGAC  | TGTGAAGA  |
| U_rev_64 | 5'-CAAGCAGAAGACGGCATAACGAGAT-TGAAGAGA-GTGACTGGAGTTCAGACGTGTGCTCTTCCGATCTGAC  | TCTCTTCA  |
| U_rev_65 | 5'-CAAGCAGAAGACGGCATAACGAGAT-TGGAACAA-GTGACTGGAGTTCAGACGTGTGCTCTTCCGATCTGAC  | TTGTTCCA  |
| U_rev_66 | 5'-CAAGCAGAAGACGGCATAACGAGAT-TGGCTTCA-GTGACTGGAGTTCAGACGTGTGCTCTTCCGATCTGAC  | TGAAGCCA  |
| U_rev_67 | 5'-CAAGCAGAAGACGGCATAACGAGAT-TGGTGGTA-GTGACTGGAGTTCAGACGTGTGCTCTTCCGATCTGAC  | TACCACCA  |
| U_rev_68 | 5'-CAAGCAGAAGACGGCATAACGAGAT-TTACGCA-GTGACTGGAGTTCAGACGTGTGCTCTTCCGATCTGAC   | TGCGTGAA  |
| U_rev_69 | 5'-CAAGCAGAAGACGGCATAACGAGAT-AACTCACC-GTGACTGGAGTTCAGACGTGTGCTCTTCCGATCTGAC  | GGTGAGTT  |
| U_rev_70 | 5'-CAAGCAGAAGACGGCATAACGAGAT-AAGAGATC-GTGACTGGAGTTCAGACGTGTGCTCTTCCGATCTGAC  | GATCTCTT  |
| U_rev_71 | 5'-CAAGCAGAAGACGGCATAACGAGAT-AAGGACAC-GTGACTGGAGTTCAGACGTGTGCTCTTCCGATCTGAC  | GTGTCTTT  |
| U_rev_72 | 5'-CAAGCAGAAGACGGCATAACGAGAT-AATCCGTC-GTGACTGGAGTTCAGACGTGTGCTCTTCCGATCTGAC  | GACGGATT  |
| U_rev_73 | 5'-CAAGCAGAAGACGGCATAACGAGAT-AATGTGTC-GTGACTGGAGTTCAGACGTGTGCTCTTCCGATCTGAC  | GCAACATT  |
| U_rev_74 | 5'-CAAGCAGAAGACGGCATAACGAGAT-ACACGACC-GTGACTGGAGTTCAGACGTGTGCTCTTCCGATCTGAC  | GGTCGTGT  |
| U_rev_75 | 5'-CAAGCAGAAGACGGCATAACGAGAT-ACAGATTTC-GTGACTGGAGTTCAGACGTGTGCTCTTCCGATCTGAC | GATCTGTG  |
| U_rev_76 | 5'-CAAGCAGAAGACGGCATAACGAGAT-AGATGTAC-GTGACTGGAGTTCAGACGTGTGCTCTTCCGATCTGAC  | GTACATCT  |
| U_rev_77 | 5'-CAAGCAGAAGACGGCATAACGAGAT-AGCACCTC-GTGACTGGAGTTCAGACGTGTGCTCTTCCGATCTGAC  | GAGGTGCT  |
| U_rev_78 | 5'-CAAGCAGAAGACGGCATAACGAGAT-AGCCATGC-GTGACTGGAGTTCAGACGTGTGCTCTTCCGATCTGAC  | GCATGGCT  |
| U_rev_79 | 5'-CAAGCAGAAGACGGCATAACGAGAT-AGGTAAC-GTGACTGGAGTTCAGACGTGTGCTCTTCCGATCTGAC   | GTTAGCCT  |
| U_rev_80 | 5'-CAAGCAGAAGACGGCATAACGAGAT-ATAGCGAC-GTGACTGGAGTTCAGACGTGTGCTCTTCCGATCTGAC  | GTGCTAT   |
| U_rev_81 | 5'-CAAGCAGAAGACGGCATAACGAGAT-ATCATTCC-GTGACTGGAGTTCAGACGTGTGCTCTTCCGATCTGAC  | GGAAATGAT |
| U_rev_82 | 5'-CAAGCAGAAGACGGCATAACGAGAT-ATTGGCTC-GTGACTGGAGTTCAGACGTGTGCTCTTCCGATCTGAC  | GAGCCAAT  |
| U_rev_83 | 5'-CAAGCAGAAGACGGCATAACGAGAT-CAAGGAGC-GTGACTGGAGTTCAGACGTGTGCTCTTCCGATCTGAC  | GCTCCTTG  |
| U_rev_84 | 5'-CAAGCAGAAGACGGCATAACGAGAT-CACCTTAC-GTGACTGGAGTTCAGACGTGTGCTCTTCCGATCTGAC  | GTAAGGTG  |
| U_rev_85 | 5'-CAAGCAGAAGACGGCATAACGAGAT-CCATCTC-GTGACTGGAGTTCAGACGTGTGCTCTTCCGATCTGAC   | GAGGATGG  |
| U_rev_86 | 5'-CAAGCAGAAGACGGCATAACGAGAT-CCGACAAC-GTGACTGGAGTTCAGACGTGTGCTCTTCCGATCTGAC  | GTTGTGCG  |
| U_rev_87 | 5'-CAAGCAGAAGACGGCATAACGAGAT-CCTAATCC-GTGACTGGAGTTCAGACGTGTGCTCTTCCGATCTGAC  | GGATTAGG  |
| U_rev_88 | 5'-CAAGCAGAAGACGGCATAACGAGAT-CCTCTATC-GTGACTGGAGTTCAGACGTGTGCTCTTCCGATCTGAC  | GATAGAGG  |
| U_rev_89 | 5'-CAAGCAGAAGACGGCATAACGAGAT-CGACACAC-GTGACTGGAGTTCAGACGTGTGCTCTTCCGATCTGAC  | GTGTGTGCG |
| U_rev_90 | 5'-CAAGCAGAAGACGGCATAACGAGAT-CGGATTGC-GTGACTGGAGTTCAGACGTGTGCTCTTCCGATCTGAC  | GCAATCCG  |
| U_rev_91 | 5'-CAAGCAGAAGACGGCATAACGAGAT-CTAAGGTC-GTGACTGGAGTTCAGACGTGTGCTCTTCCGATCTGAC  | GACCTTAG  |
| U_rev_92 | 5'-CAAGCAGAAGACGGCATAACGAGAT-GAACAGGC-GTGACTGGAGTTCAGACGTGTGCTCTTCCGATCTGAC  | GCCTGTTC  |
| U_rev_93 | 5'-CAAGCAGAAGACGGCATAACGAGAT-GACAGTGC-GTGACTGGAGTTCAGACGTGTGCTCTTCCGATCTGAC  | GCACGTGC  |
| U_rev_94 | 5'-CAAGCAGAAGACGGCATAACGAGAT-GAGTTAGC-GTGACTGGAGTTCAGACGTGTGCTCTTCCGATCTGAC  | GCTAACTC  |
| U_rev_95 | 5'-CAAGCAGAAGACGGCATAACGAGAT-GATGAATC-GTGACTGGAGTTCAGACGTGTGCTCTTCCGATCTGAC  | GATTCATC  |
| U_rev_96 | 5'-CAAGCAGAAGACGGCATAACGAGAT-GCCAAGAC-GTGACTGGAGTTCAGACGTGTGCTCTTCCGATCTGAC  | GTCTTGGC  |

**(B) Illumina sequencing reaction**

| ID     | Sequence                                 | Barcode |
|--------|------------------------------------------|---------|
| Read_1 | 5'-ACACTCTTCCCTACACGACGCTCTTCCGATCTCTG   | NA      |
| Read_2 | 5'-GTGACTGGAGTTCAGACGTGTGCTCTTCCGATCTGAC | NA      |
